# Supplementary material for: Multimorbidity patterns in patients with heart failure: an observational Spanish study based on electronic health records
Source: PubMed Central journal article supplement — BMJ Open. 2019 Dec 23;9(12):e033174. doi: 10.1136/bmjopen-2019-033174 (PMC7008407; doi:10.1136/bmjopen-2019-033174), 2019-12-23
Supplement: bmjopen-2019-033174.draft_revisions.pdf [file bmjopen-2019-033174.draft_revisions.pdf]

# BMJ Open

BMJ Open is committed to open peer review. As part of this commitment we make the peer review history of every article we publish publicly available.

When an article is published we post the peer reviewers' comments and the authors' responses online. We also post the versions of the paper that were used during peer review. These are the versions that the peer review comments apply to.

The versions of the paper that follow are the versions that were submitted during the peer review process. They are not the versions of record or the final published versions. They should not be cited or distributed as the published version of this manuscript.

BMJ Open is an open access journal and the full, final, typeset and author-corrected version of record of the manuscript is available on our site with no access controls, subscription charges or pay-per-view fees (<http://bmjopen.bmj.com>).

If you have any questions on BMJ Open's open peer review process please email [info.bmjopen@bmj.com](mailto:info.bmjopen@bmj.com)

# BMJ Open

## Multimorbidity patterns in patients with heart failure: an observational population study based on electronic health records.

|                               |                                                                                                                                                                                                                                                                                                                                                                                                                                                                                                                                                                                                                                                                                                                                                                                                                                                                                                                                                                                                                                                        |
|-------------------------------|--------------------------------------------------------------------------------------------------------------------------------------------------------------------------------------------------------------------------------------------------------------------------------------------------------------------------------------------------------------------------------------------------------------------------------------------------------------------------------------------------------------------------------------------------------------------------------------------------------------------------------------------------------------------------------------------------------------------------------------------------------------------------------------------------------------------------------------------------------------------------------------------------------------------------------------------------------------------------------------------------------------------------------------------------------|
| Journal:                      | <i>BMJ Open</i>                                                                                                                                                                                                                                                                                                                                                                                                                                                                                                                                                                                                                                                                                                                                                                                                                                                                                                                                                                                                                                        |
| Manuscript ID                 | bmjopen-2019-033174                                                                                                                                                                                                                                                                                                                                                                                                                                                                                                                                                                                                                                                                                                                                                                                                                                                                                                                                                                                                                                    |
| Article Type:                 | Research                                                                                                                                                                                                                                                                                                                                                                                                                                                                                                                                                                                                                                                                                                                                                                                                                                                                                                                                                                                                                                               |
| Date Submitted by the Author: | 23-Jul-2019                                                                                                                                                                                                                                                                                                                                                                                                                                                                                                                                                                                                                                                                                                                                                                                                                                                                                                                                                                                                                                            |
| Complete List of Authors:     | Gimeno-Miguel, A ; Aragon Health Sciences Institute, EpiChron Research Group. IIS Aragón; REDISSEC<br>Gracia Gutiérrez, Anyuli; Internal Medicine Service, Lozano Blesa University Hospital, Research Group on Heart Failure, IIS Aragón Poblador-Plou, Beatriz; Aragon Health Sciences Institute, EpiChron Research Group. IIS Aragón; REDISSEC<br>Coscollar-Santaliestra, Carlos; Primary Care Health Centre San Pablo, SALUD; EpiChron Research Group. IIS Aragón<br>Pérez-Calvo, J Ignacio; Internal Medicine Service, Lozano Blesa University Hospital, Research Group on Heart Failure. IIS Aragón; University of Zaragoza Faculty of Medicine<br>Divo, Miguel J; Brigham and Women ´s Hospital, Harvard Medical School, Pulmonary and Critical Care Division<br>Calderón-Larrañaga, Amaia; Karolinska Institutet<br>Prados-Torres, Alexandra; Aragon Health Sciences Institute, EpiChron Research Group. IIS Aragón; REDISSEC<br>Ruiz-Laiglesia, F.-J; Hospital Clínico Universitario Lozano Blesa, Research Group on Heart Failure. IIS Aragón |
| Keywords:                     | Heart failure < CARDIOLOGY, Multimorbidity, Comorbidity, Patterns, Hospitalization                                                                                                                                                                                                                                                                                                                                                                                                                                                                                                                                                                                                                                                                                                                                                                                                                                                                                                                                                                     |
|                               |                                                                                                                                                                                                                                                                                                                                                                                                                                                                                                                                                                                                                                                                                                                                                                                                                                                                                                                                                                                                                                                        |

SCHOLARONE™  
Manuscripts

1  
2  
3 **1 Multimorbidity patterns in patients with heart failure: an observational population study**  
4  
5 **2 based on electronic health records.**  
6  
7

8 Antonio Gimeno-Miguel<sup>1\*</sup>, Anyuli Gracia Gutiérrez<sup>2\*</sup>, Beatriz Poblador-Plou<sup>1</sup>, Carlos  
9  
10 Coscollar-Santaliestra<sup>3</sup>, J Ignacio Pérez-Calvo<sup>4</sup>, Miguel J Divo<sup>5</sup>, Amaia Calderón Larrañaga<sup>6</sup>,  
11  
12 Alexandra Prados-Torres<sup>1†</sup>, Fernando J Ruiz-Laiglesia<sup>2†</sup>  
13  
14

15  
16 \* These authors contributed equally to this work and served as first co-authors.  
17

18  
19 †These authors contributed equally to this work and served as senior co-authors.  
20

21  
22 <sup>1</sup>EpiChron Research Group, Aragon Health Sciences Institute (IACS), IIS Aragón. Health  
23  
24 Services Research on Chronic Patients Network (REDISSEC). Miguel Servet University  
25  
26 Hospital, Zaragoza, Spain.  
27

28  
29 <sup>2</sup>Research Group on Heart Failure, IIS Aragón. Internal Medicine Service, Lozano Blesa  
30  
31 University Hospital, Zaragoza, Spain.  
32

33  
34 <sup>3</sup>EpiChron Research Group, IIS Aragón. Primary Care Health Centre San Pablo, SALUD,  
35  
36 Zaragoza, Spain.  
37

38  
39 <sup>4</sup>Research Group on Heart Failure, IIS Aragón. Internal Medicine Service, Lozano Blesa  
40  
41 University Hospital. Faculty of Medicine, University of Zaragoza, Zaragoza, Spain.  
42

43  
44 <sup>5</sup>Pulmonary and Critical Care Division, Brigham and Women's Hospital, Harvard Medical  
45  
46 School, Boston, Massachusetts, United States of America.  
47

48  
49  
50 <sup>6</sup>Aging Research Center, Karolinska Institutet, Stockholm, Sweden.  
51

52  
53 **Correspondence:** Antonio Gimeno Miguel. EpiChron Research Group, IACS. Miguel Servet  
54  
55 University Hospital, Paseo Isabel la Católica 1-3. 50009, Zaragoza, Spain. Tel +34976765500.  
56  
57 [agimenomi.iacs@aragon.es](mailto:agimenomi.iacs@aragon.es)  
58  
59  
60

1  
2  
3 **23 Abstract**  
4  
5

6 **24 Objectives:** To characterize the comorbidities of heart failure (HF), to explore their clustering  
7  
8 **25** into multimorbidity patterns, and to measure the impact of such patterns on the risk of  
9  
10 **26** hospitalization and mortality.

11  
12  
13 **27 Design:** Observational retrospective population study based on electronic health records.  
14  
15

16 **28 Setting:** EpiChron Cohort (Aragón, Spain).  
17  
18

19 **29 Participants:** All primary and hospital care patients of the EpiChron Cohort with a diagnosis of  
20  
21 **30** HF in 2011 (i.e., 14,670). We considered all their chronic diseases registered in patients'  
22  
23 **31** electronic health records until the end of 2011.  
24  
25

26 **32 Primary outcome:** We applied an exploratory factor analysis to identify the multimorbidity  
27  
28 **33** patterns, and logistic and Cox proportional-hazards regressions to investigate the association  
29  
30 **34** between the patterns and the risk of hospitalization in 2012 and of three-year mortality,  
31  
32 **35** respectively.  
33  
34

35 **36 Results:** Almost all HF patients (98%) had multimorbidity, with an average of 7.8 chronic  
36  
37 **37** diseases per patient. We identified six different multimorbidity patterns, named cardiovascular,  
38  
39 **38** neurovascular, coronary, metabolic, degenerative, and respiratory. The most prevalent patterns  
40  
41 **39** were the degenerative (64.0%) and cardiovascular (29.9%) in women, and the metabolic  
42  
43 **40** (49.3%) and cardiovascular (43.2%) in men. All patterns were associated with higher risk of  
44  
45 **41** hospitalization; and the cardiovascular, neurovascular and respiratory patterns significantly  
46  
47 **42** increased the likelihood of three-year mortality.  
48  
49

50  
51 **43 Conclusions:** Multimorbidity is by far the norm rather than the exception in patients with heart  
52  
53 **44** failure, whose comorbidities tend to cluster together beyond simple chance in the form of  
54  
55 **45** multimorbidity patterns that have different impact on health outcomes. This knowledge could  
56  
57 **46** be useful to better understand common pathophysiological pathways underlying this condition  
58  
59  
60

1  
2  
3 47 and its comorbidities, and factors influencing the prognosis of these patients. Further large scale  
4  
5 48 longitudinal studies are encouraged to confirm the existence of these patterns as well as their  
6  
7 49 differential impact on health outcomes.  
8  
9

10 50

11  
12  
13 51 **Keywords:** Heart failure; Multimorbidity; Comorbidity; Patterns; Hospitalization  
14  
15

16 52

17  
18  
19 53 **Word count:** 3182  
20  
21  
22

23 54

24  
25  
26 55 **Article Summary**  
27

28  
29 56 *Strengths and limitations of the study*  
30  
31

32 57 - This is a large-scale population-based study including all primary and hospital care real life  
33  
34 58 patients of the reference population with a diagnosis of HF.  
35

36  
37 59 - Data in the cohort continuously undergo quality control check-ups that ensure their accuracy  
38  
39 60 and reliability for use in research.  
40  
41

42 61 - The cross-sectional characterization of the multimorbidity patterns makes it impossible to  
43  
44 62 understand the chronological relationship between the different risk factors and chronic  
45  
46 63 diseases.  
47  
48

49  
50 64 - Diagnoses were extracted from electronic health records that were not originally designed for  
51  
52 65 research, thus leading to a potential over or under-reporting of specific diseases.  
53  
54

55 66 - The estimation of the effect of multimorbidity patterns on health outcomes did not consider  
56  
57 67 the potential confounding role of socioeconomic factors or clinical parameters like the ejection  
58  
59 68 fraction, which were not available in the study cohort.  
60

69

## 70 **Introduction**

71 Improvements in diagnostic and therapeutic procedures have decreased mortality rates  
72 associated to heart failure (HF), transforming this condition into a chronic disease with a high  
73 burden of comorbidity, as confirmed by European HF registries.<sup>1</sup> The population affected by HF  
74 is complex and presents with different phenotypes depending on age, sex, comorbidity, and  
75 pathophysiological and prognostic aspects.<sup>2</sup> Both cardiovascular and non-cardiovascular  
76 comorbidity are determining factors in the differentiation of these phenotypes and their impact  
77 on health outcomes. In fact, HF patients with non-cardiovascular comorbidity show increased  
78 disease burden, severity, risk of hospitalization and death.<sup>3,4</sup>

79         Recent studies have examined the most prevalent comorbidities in HF patients and their  
80 prognostic impact on mortality rates and hospital readmissions.<sup>2,5,6</sup> However, although the  
81 existence of non-random associations among chronic HF comorbidities and their clustering into  
82 multimorbidity patterns has already been demonstrated,<sup>7</sup> most studies still focus on isolated  
83 comorbidities, without considering the interrelations among them. Among the few studies  
84 addressing multimorbidity in HF patients, some restrict their analyses to the most frequently co-  
85 occurring combinations of two and three comorbidities,<sup>8</sup> others are conducted in relatively small  
86 samples,<sup>9</sup> and the methodological approaches in terms of data source, studied comorbidities, and  
87 applied statistical technique vary considerably.<sup>3,8-10</sup> Moreover, there is a need to perform studies  
88 on real life patients from primary care, the level of care where multimorbidity is most frequently  
89 dealt with.

90         The Academy of Medical Sciences recently highlighted the importance of investigating  
91 which multimorbidity patterns cause the greatest burden, and what are the determinants of the  
92 most common clusters of conditions.<sup>11</sup> Improving our knowledge on the systematic associations  
93 among HF comorbidities is of great interest because some of them are known to share common  
94 biological and socioeconomic risk factors on which prevention strategies could be based.

1  
2  
3 95 Further, the identification and clinical characterization of multimorbidity patterns in patients  
4  
5 96 with HF and the study of their potential impact on negative health outcomes (e.g., risk of death  
6  
7 97 and hospitalization) could shed light on new pathophysiological pathways that may guide the  
8  
9 98 development of clinical practice guidelines better adapted to patients with HF.<sup>12</sup>  
10  
11

12 99 This large-scale population study based on electronic health records from real life  
13  
14 100 primary and hospital care patients aimed to characterize the comorbidities of HF, to explore  
15  
16 101 their clustering into multimorbidity patterns, and to measure the impact of such patterns on  
17  
18 102 negative health outcomes.  
19  
20

21  
22 103

## 23 24 25 104 **Methods**

### 26 27 28 105 *Design and study population*

29  
30  
31 106 We conducted a retrospective observational study based on data from the EpiChron Cohort that  
32  
33 107 links demographic, clinical and health outcomes information for all public health system users  
34  
35 108 of the Spanish region of Aragón. A description of the cohort profile and of the data sources was  
36  
37 109 published elsewhere.<sup>13</sup> This cohort was conformed in 2011 and it included 1,253,292 people at  
38  
39 110 baseline (approximately 95% of total inhabitants of Aragón). For this study, we selected and  
40  
41 111 followed up for three years all patients with a diagnosis of HF in their primary or hospital  
42  
43 112 electronic health records on 31<sup>st</sup> January 2011.  
44  
45

### 46 47 113 *Outcome variables*

48  
49  
50 114 For each patient, we analysed data on demographics (i.e., age, sex, area of residence, immigrant  
51  
52 115 status), healthcare use during 2012 (i.e., use of primary care, specialized care, hospital and  
53  
54 116 emergency services), diagnoses of chronic conditions registered in both primary and hospital  
55  
56 117 care, and all-cause mortality until 31<sup>st</sup> December 2014. Diagnoses were originally coded  
57  
58 118 according to the International Classification of Primary Care (ICPC) or the International  
59  
60

1  
2  
3 119 Classification of Diseases, Ninth Revision, Clinical Modification (ICD-9-CM), and  
4  
5 120 subsequently grouped in Expanded Diagnostic Clusters (EDCs) through the Johns Hopkins  
6  
7 121 ACG® System (version 11.0, The Johns Hopkins University, Baltimore, MD, US). We  
8  
9 122 considered for the study all patients with the EDC code CAR05, which includes ICPC and ICD-  
10  
11 123 9-CM codes for HF. We included in the analysis all of the 114 EDCs previously defined as  
12  
13 124 chronic by Salisbury et al.<sup>14</sup>

15  
16 125 This study complies with the Declaration of Helsinki, and the research protocol was  
17  
18 126 approved by the Clinical Research Ethics Committee of Aragón (CEICA, PI18/082). The  
19  
20 127 CEICA waived the requirement to obtain the informed consent from patients since the  
21  
22 128 information used was anonymised.

### 23 24 25 26 129 *Statistical analyses*

27  
28  
29 130 All analyses were stratified by sex. First, we performed a descriptive analysis of demographic  
30  
31 131 and clinical information of the population with HF. We compared means and frequencies using  
32  
33 132 the Student t test and the chi-squared test, respectively, with their respective 95% confidence  
34  
35 133 intervals.

36  
37  
38 134 Second, we applied an exploratory factor analysis to identify the existence of non-random  
39  
40 135 associations among chronic diseases. To facilitate the epidemiological and clinical interpretation  
41  
42 136 of the results, we only included in the analysis those comorbidities with a prevalence  $\geq 5\%$ . The  
43  
44 137 methodology followed was described elsewhere.<sup>7</sup> Briefly, EDCs were coded as binary variables  
45  
46 138 (present/absent), and a factor analysis based on a tetrachoric correlation matrix was performed  
47  
48 139 to determine which diagnoses comprised each factor. We used the principal factor method for  
49  
50 140 the extraction of the factors, and a scree plot in combination with clinical criteria to determine  
51  
52 141 the number of factors to extract. We selected EDCs with factor scores  $\geq 0.25$  as those belonging  
53  
54 142 to each multimorbidity pattern. Model goodness-of-fit and sample adequacy were calculated  
55  
56 143 through the proportions of cumulative variance and the Kaiser-Meyer-Olkin (KMO) parameter.  
57  
58 144 After performing the factor analysis, three clinical experts (FRL, CCS, and APT) proposed and  
59  
60



1  
2  
3 145 agreed upon the denomination of the resulting patterns. Individuals were subsequently assigned  
4  
5 146 to one or more of the described patterns of multimorbidity if they had at least two of the  
6  
7 147 diseases that comprised the pattern (in addition to HF), as described by Prados et al.<sup>7</sup>  
8  
9

10 148 Finally, we applied logistic and Cox proportional-hazards regressions to calculate the  
11  
12 149 risk of having at least one hospitalization during 2012 and of three-year mortality, respectively,  
13  
14 150 depending on the multimorbidity pattern suffered by the individual. Patients' age (continuous  
15  
16 151 variable) and all multimorbidity patterns were included as independent variables in the models.  
17  
18 152 We used Kaplan-Meier survival curves to represent and compare survival rates of individuals  
19  
20 153 with specific multimorbidity patterns, which were tested for the proportional hazard  
21  
22 154 assumption.  
23  
24  
25

26 155 We conducted all the statistical analysis in STATA (Version 12.0, StataCorp LLC,  
27  
28 156 College Station, TX, US). Statistical significance was set at  $p < 0.05$ .  
29  
30

31 157  
32  
33

## 34 158 **Results**

35  
36  
37 159 A total of 14,670 patients from the EpiChron Cohort had a diagnosis of HF in 2011,  
38  
39 160 representing around 1.1% of the total population in Aragón. The study population is described  
40  
41 161 in Table 1. A predominance of women was observed (57.9% vs 42.1%,  $p < 0.001$ ), who were on  
42  
43 162 average older than men (79.9 vs 75.2 years,  $p < 0.001$ ) mainly due to a higher proportion of  
44  
45 163 people aged  $\geq 85$  years. The cumulative mortality rate throughout the three-year follow-up was  
46  
47 164 higher in men compared with women (36.5% vs 33.3 %,  $p < 0.001$ ), and the same pattern was  
48  
49 165 observed for hospital admissions.  
50  
51  
52

53 166 In our study, almost all patients with HF (98%) suffered from multimorbidity, with an  
54  
55 167 average of 7.8 chronic diseases per patient. The most prevalent HF comorbidities were similar  
56  
57 168 in women and in men, as hypertension (71.2% vs 65.0%), dyslipidemia (36.9% vs 37.6%),  
58  
59 169 arthropathy (36.8% vs 23.9%), cardiac arrhythmia (35.5% vs 42.6%) and diabetes (30.3% vs  
60

1  
2  
3 170 32.3%). Except for hypertension, which was more frequent in women, cardiovascular  
4  
5 171 comorbidities (i.e., ischemic heart disease and arrhythmias) were more prevalent in men, as well  
6  
7 172 as COPD. Arthropathy, varicose veins of lower extremities, obesity, osteoporosis, dementia and  
8  
9 173 depression were also highly prevalent in HF patients, especially in women.  
10  
11

12 174 As a result of the factorial analysis, six multimorbidity patterns were identified and  
13  
14 175 described in women, named cardiovascular, respiratory, metabolic, coronary-ischemic,  
15  
16 176 degenerative, and neurovascular. In men, we only identified five patterns, which were similar to  
17  
18 177 those observed in women with the exception of the respiratory pattern. The composition of the  
19  
20 178 patterns of multimorbidity in women and men is detailed in Tables 2 and 3, respectively. In  
21  
22 179 women, these patterns explained up to 40.5% of the cumulative total variance, with a KMO of  
23  
24 180 0.753. In men, the patterns explained up to 37.3% of the cumulative total variance, with a KMO  
25  
26 181 of 0.761.  
27  
28  
29

30 182 A high proportion of the study population was assigned to these patterns, with  
31  
32 183 prevalence rates ranging from 13.5% (neurovascular) to 64.0% (degenerative) in women, and  
33  
34 184 from 22.2% (neurovascular) to 49.3% (metabolic) in men. The prevalence and impact on health  
35  
36 185 outcomes of such multimorbidity patterns is described in Table 4. In general, all patterns were  
37  
38 186 associated with increased risk of hospitalization during the following year (by 12-86%) in both  
39  
40 187 men and women compared with the absence of the pattern, except for the degenerative pattern  
41  
42 188 in women. The cardiovascular, neurovascular and respiratory patterns significantly increased  
43  
44 189 the likelihood of three-year mortality (by 45-74%) in both sexes. The Kaplan-Meier survival  
45  
46 190 curves of population with HF according to different multimorbidity patterns are presented in  
47  
48 191 Figure 1.  
49  
50  
51

52 192

## 55 193 **Discussion**

### 58 194 *Comorbidity of Heart Failure*

1  
2  
3 195 The population with HF of our study suffered a higher morbidity burden than that found in the  
4  
5 196 general population of the EpiChron Cohort.<sup>13</sup> Regarding comorbidity of HF, cardiovascular  
6  
7 197 comorbidities (i.e., ischemic heart disease and arrhythmias), except for hypertension that was  
8  
9 198 more frequent in women, were more prevalent in men, as previously seen in the literature.<sup>1</sup>  
10  
11

12 199 The higher prevalence of COPD in men compared to women was probably due to the  
13  
14 200 higher rates of smoking among Spanish men. While the estimated prevalence of COPD in the  
15  
16 201 general Spanish population is 15% in men and 6% in women, these figures were almost doubled  
17  
18 202 in our HF cohort, approaching the 25.6% described in the EAHFE-COPD Study on acute HF  
19  
20 203 patients.<sup>15</sup> This higher prevalence of COPD might be explained because a) both COPD and HF  
21  
22 204 share similar symptoms; b) beta-blockers (indicated for HF) and bronchodilators (indicated for  
23  
24 205 COPD) exert an effect on both pathologies; and c) heart congestion alters pulmonary function  
25  
26 206 tests, among others. The fact that 80% of COPD cases are associated with smoking but close to  
27  
28 207 50% of HF patients have never smoked makes some authors think that COPD could be over-  
29  
30 208 diagnosed in HF patients.<sup>16</sup>  
31  
32  
33

34 209 Comorbid depression, which was predominantly observed in women, presented a  
35  
36 210 prevalence 2-3 times higher than that observed in the general population.<sup>13</sup> Its prevalence is  
37  
38 211 consistent with that reported in the meta-analytic review by Rutledge et al,<sup>17</sup> where the mean  
39  
40 212 prevalence of depression in HF patients was 21.5%. Depression has been associated to worse  
41  
42 213 prognosis in patients with cardiovascular disease in terms of mortality, hospital admissions and  
43  
44 214 functional status.<sup>1</sup> However, its role as a potential risk factor for the development of HF is less  
45  
46 215 consistent; so far, this has only been proved in women and in older patients with systolic  
47  
48 216 hypertension.<sup>18</sup> The greater prevalence of hypothyroidism observed in HF patients compared to  
49  
50 217 the general population, especially in women, could be partially explained by the structural and  
51  
52 218 hemodynamic secondary effects of thyroid hormones on the heart. The higher prevalence of  
53  
54 219 hypothyroidism observed in women compared to men is congruent with the results from the  
55  
56 220 Euro Heart Failure Survey II.<sup>19</sup>  
57  
58  
59  
60

1  
2  
3 221 The cumulative mortality rate throughout the three-year follow-up, which was higher in  
4  
5 222 men, is in line with the results obtained by Levy et al<sup>20</sup> who described greater survival of  
6  
7 223 women with HF compared to men based on the Framingham Heart Study. The clinical  
8  
9 224 composition of the multimorbidity patterns found in the study and their impact on mortality and  
10  
11 225 hospitalization is discussed below.

### 14 226 *Cardiovascular pattern*

17 227 Almost half of men (43.2%) and one third of women (29.9%) were affected by this pattern. It  
18  
19 228 mainly included cardiac arrhythmia, cardiac valve disorders and hematologic disorders (e.g.,  
20  
21 229 anticoagulant therapy), as well as chronic renal failure and anemia. Kidney and heart diseases  
22  
23 230 share common risk factors and they are interrelated through adaptive mechanisms. Moreover,  
24  
25 231 chronic failure of both organs, volume overload, increased levels of cytokines, malabsorption  
26  
27 232 syndrome, suppression of the bone marrow and anticoagulation treatment increase the  
28  
29 233 frequency of anemia in HF patients.<sup>21</sup> The presence of these comorbidities in the cardiovascular  
30  
31 234 but not the coronary-ischemic pattern could imply a greater deterioration in HF patients  
32  
33 235 suffering from the former pattern. In fact, patients presenting with the cardiovascular pattern  
34  
35 236 showed significantly higher risk of both studied health outcomes in both sexes. This pattern  
36  
37 237 showed the strongest association with hospitalization, increasing the risk by more than 80%,  
38  
39 238 probably due to the hemodynamic dysfunction produced by cardiac arrhythmias and anemia,  
40  
41 239 which often leads to decompensation and subsequent hospitalization.<sup>22</sup>

### 46 240 *Respiratory pattern*

49 241 This pattern, which was present in 16.9% of women, had COPD and asthma as the most  
50  
51 242 strongly associated diseases. The absence of a specific respiratory pattern in men is remarkable,  
52  
53 243 as it is the absence of COPD in the rest of patterns, considering the acknowledged association  
54  
55 244 between COPD and ischemic heart disease,<sup>23</sup> both related to HF, and the high prevalence of  
56  
57 245 COPD particularly in men. Ahmad et al<sup>24</sup> found that COPD appeared in several clusters of  
58  
59 246 patients with HF, especially in those with higher morbidity burden, which also clustered with

1  
2  
3 247 ischemic heart disease, cerebrovascular disease, smoking and male sex. In our study, COPD did  
4  
5 248 not come up as part of any pattern in men, suggesting a lack of discriminative power of this  
6  
7 249 disease in terms of disease clustering in men with HF. Nevertheless, this pattern had the second-  
8  
9 250 highest impact on both mortality and hospitalization in women.

### 12 251 *Metabolic pattern*

15 252 This pattern was the most prevalent in both sexes, affecting half of men and women.  
17  
18 253 The metabolic pattern included obesity, hypertension, diabetes and dyslipidemia; all risk factors  
19  
20 254 conforming the so-called metabolic syndrome. This pattern has been consistently identified  
21  
22 255 across studies carried out in the general population, and in 18% of patients with HF, with no  
23  
24 256 gender differences.<sup>25</sup> This higher prevalence of the pattern observed in our study could be due to  
25  
26 257 the fact that only two diseases had to be present to assign patients to this pattern. When this  
27  
28 258 condition was restricted to present three or more conditions, the prevalence decreased to 21.3%  
29  
30 259 in women and 22.1% in men, which are closer to previously published rates. Suffering from this  
31  
32 260 pattern was not associated with increased three-year mortality either in men or women, which is  
33  
34 261 in line with the literature, probably due to reverse epidemiology whereby HF patients with  
35  
36 262 cardiovascular risk factors have better prognosis.<sup>26</sup> However, patients presenting with this  
37  
38 263 pattern did show a significantly higher risk of hospitalization; 37% in men and 26% in women.

### 42 264 *Coronary-ischemic pattern*

45 265 Although this pattern appeared in both sexes, it was much more prevalent in men (24.7% vs  
46  
47 266 6.6%). It clustered together ischemic heart disease and acute myocardial infarction, and along  
48  
49 267 with the metabolic pattern, it was one of the most consistent patterns from the clinical point of  
50  
51 268 view. The evolution from micro and macrovascular endothelial damage caused by  
52  
53 269 arteriosclerosis to myocardial injury represents the pathophysiological continuum underlying  
54  
55 270 this pattern. However, this hypothesis could not be tested in our study since the medical history  
56  
57 271 of HF patients was unknown. Previous studies have corroborated the late appearance of  
58  
59 272 ischemic heart disease in women with diabetes and hypertension, whereas, in men, this

1  
2  
3 273 condition appears earlier and in association to myocardial infarction and smoking.<sup>27</sup> This pattern  
4  
5 274 increased the risk of hospitalization in both men and women, but it was not associated with  
6  
7 275 greater three-year mortality in either sex. This may be explained by the effectiveness of beta-  
8  
9 276 blockers, aldosterone antagonists and angiotensin-converting enzyme inhibitors on reducing the  
10  
11 277 risk of sudden death and prolonging survival in patients with HF,<sup>28</sup> although this hypothesis  
12  
13 278 needs further investigation based on longer follow-ups.

### 16 279 *Neurovascular pattern*

17  
18  
19  
20 280 This pattern was identified in both men (22.2%) and women (13.6%), and included conditions  
21  
22 281 related to arteriosclerotic damage in target organs of (i.e., kidney, extremities and brain) and  
23  
24 282 thromboembolism secondary to cardiac arrhythmia. The presence of dementia in this pattern  
25  
26 283 does not come unexpected. A well-known relationship exists between cognitive impairment and  
27  
28 284 HF, due to low cerebral perfusion, atrial fibrillation, and brain changes secondary to the neuro-  
29  
30 285 hormonal adaptation mechanisms underlying HF.<sup>29</sup> Patients with this pattern had among the  
31  
32 286 highest risk of three-year mortality. However, its effect on the risk of hospitalization differed by  
33  
34 287 sex. Whereas it had no effect in women, it increased the risk of hospitalization by 62% in men.  
35  
36 288 This finding was unexpected, especially bearing in mind that both women and men suffering  
37  
38 289 from this pattern were considerably older.

### 41 290 *Degenerative pattern*

42  
43  
44  
45 291 This pattern was predominantly described in women (64.0% vs 29.2%) and it included  
46  
47 292 degenerative conditions such as arthropathy, cataract, aphakia, and deafness and hearing loss.  
48  
49 293 Although this pattern would be expected to entail a greater degree of dependency than others, in  
50  
51 294 the longitudinal nine-year study of Jackson et al,<sup>30</sup> the neurological and cardiovascular patterns  
52  
53 295 derived in greater limitations on activities of daily living compared to the degenerative pattern  
54  
55 296 identified by these authors. The co-occurrence in this pattern of venous disease,  
56  
57 297 thrombophlebitis, osteoporosis and dermatitis may be conditioned by the consequent physical  
58  
59 298 activity restriction in patients with HF. Regarding the risk of hospitalization, this pattern was

1  
2  
3 299 associated with a low but significant increased risk in women but it had no effect in men. The  
4  
5 300 degenerative pattern was the only one associated to a decreased risk of three-year mortality in  
6  
7 301 both men and women. This could be due to the lower clinical severity of the conditions  
8  
9 302 conforming this pattern, some of which are typical of older age.  
10  
11

12 303

15 304 **Conclusion**

17  
18 305 This study confirmed that multimorbidity is by far the norm rather than the exception in patients  
19  
20 306 with heart failure, and that comorbidities tend to cluster together beyond simple chance in the  
21  
22 307 form of multimorbidity patterns that have different impact on health outcomes. This knowledge  
23  
24 308 could be useful to better understand common pathophysiological pathways underlying this  
25  
26 309 disease and its comorbidities, and factors influencing the prognosis of these patients. Further  
27  
28 310 large scale longitudinal studies are encouraged to confirm the existence of these patterns as well  
29  
30 311 as their differential impact on health outcomes.  
31  
32

33 312

36 313 **Author Contributions**

37  
38  
39  
40 314 APT and FJRL were the Principal Investigators of the study. AGM, AGG, APT, and FJRL  
41  
42 315 contributed to the design of the research. AGM and BPP performed the statistical analyses.  
43  
44 316 APT, FJRL, AGG, and CCS interpreted and discussed the results. AGM and AGG prepared the  
45  
46 317 first draft of the manuscript. ACL, MJD, and JIPC made important contributions to the revision  
47  
48 318 of the manuscript. All authors read and approved the final version of the manuscript.  
49  
50

51 319

54 320 **Funding**

1  
2  
3 321 This work was supported by Gobierno de Aragón [B01\_17R] and the European Regional  
4  
5 322 Development Fund 'Construyendo Europa desde Aragón'. The funders played no role in the  
6  
7 323 design of the study, collection, analysis, and interpretation of data, or preparation of the  
8  
9 324 manuscript.

10  
11  
12 325

13  
14  
15 326 **Acknowledgements**

16  
17  
18 327 The authors sincerely thank Eva Giménez Labrador for her statistical support. This work was  
19  
20 328 supported by Gobierno de Aragón [B01\_17R] and the European Regional Development Fund  
21  
22 329 'Construyendo Europa desde Aragón'.  
23  
24

25  
26 330

27  
28  
29 331 **Competing interests**

30  
31  
32 332 None declared.  
33  
34

35 333

36 334 **Patient consent for publication**

37  
38  
39 335 Not required.  
40  
41  
42

43 336

44 337 **Ethics approval**

45  
46  
47 338 This study was approved by the Clinical Research Ethics Committee of Aragón (CEICA,  
48  
49 339 PI18/082).  
50  
51

52 340

53  
54  
55 341 **Availability of data**  
56  
57  
58  
59  
60



1  
2  
3 342 The dataset generated and analyzed during the current study is not publicly available, but is  
4  
5 343 available from the corresponding author on reasonable request.  
6  
7

8 344  
9

10  
11 345 **References**  
12

13  
14 346 1. Lawson CA, Solis-Trapala I, Dahlstrom U, et al. Comorbidity health pathways in heart  
15  
16 347 failure patients: A sequences-of-regressions analysis using cross-sectional data from  
17  
18 348 10,575 patients in the Swedish Heart Failure Registry. Lam CSP, ed. *PLOS Med*.  
19  
20 349 2018;15(3):e1002540. doi:10.1371/journal.pmed.1002540  
21  
22

23  
24 350 2. Kajimoto K, Sato N, Takano T, investigators of the Acute Decompensated Heart Failure  
25  
26 351 Syndromes (ATTEND) registry. Relation of Left Ventricular Ejection Fraction and  
27  
28 352 Clinical Features or Co-morbidities to Outcomes Among Patients Hospitalized for Acute  
29  
30 353 Heart Failure Syndromes. *Am J Cardiol*. 2015;115(3):334-340.  
31  
32 354 doi:10.1016/j.amjcard.2014.11.007  
33  
34

35  
36 355 3. Horiuchi Y, Tanimoto S, Latif AHMM, et al. Identifying novel phenotypes of acute  
37  
38 356 heart failure using cluster analysis of clinical variables. *Int J Cardiol*. 2018;262:57-63.  
39  
40 357 doi:10.1016/j.ijcard.2018.03.098  
41  
42

43 358 4. Manemann SM, Chamberlain AM, Boyd CM, et al. Multimorbidity in Heart Failure:  
44  
45 359 Effect on Outcomes. *J Am Geriatr Soc*. 2016;64(7):1469-1474. doi:10.1111/jgs.14206  
46  
47

48 360 5. Shah SJ, Katz DH, Selvaraj S, et al. Phenomapping for Novel Classification of Heart  
49  
50 361 Failure With Preserved Ejection Fraction. *Circulation*. 2015;131(3):269-279.  
51  
52 362 doi:10.1161/CIRCULATIONAHA.114.010637  
53  
54

55 363 6. van Deursen VM, Urso R, Laroche C, et al. Co-morbidities in patients with heart failure:  
56  
57 364 an analysis of the European Heart Failure Pilot Survey. *Eur J Heart Fail*.  
58  
59 365 2014;16(1):103-111. doi:10.1002/ejhf.30  
60

- 1  
2  
3 366 7. Prados-Torres A, Poblador-Plou B, Calderón-Larrañaga A, et al. Multimorbidity patterns  
4  
5 367 in primary care: interactions among chronic diseases using factor analysis. *PLoS One*.  
6  
7 368 2012;7(2):e32190.  
8  
9  
10 369 8. Saczynski JS, Go AS, Magid DJ, et al. Patterns of comorbidity in older adults with heart  
11  
12 370 failure: the Cardiovascular Research Network PRESERVE study. *J Am Geriatr Soc*.  
13  
14 371 2013;61(1):26-33. doi:10.1111/jgs.12062  
15  
16  
17 372 9. Chamberlain AM, St Sauver JL, Gerber Y, et al. Multimorbidity in Heart Failure: A  
18  
19 373 Community Perspective. *Am J Med*. 2015;128:38-45. doi:10.1016/j.amjmed.2014.08.024  
20  
21  
22 374 10. Leva F, Bitonti D. Network analysis of comorbidity patterns in heart failure patients  
23  
24 375 using administrative data. *Epidemiol Biostat Public Heal*. 2018;15(1).  
25  
26 376 doi:10.2427/12779  
27  
28  
29 377 11. The Academy of Medical Sciences. *Multimorbidity: A Priority for Global Health*  
30  
31 378 *Research*. London; 2018. <https://acmedsci.ac.uk/file-download/82222577>. Accessed  
32  
33 379 April 24, 2018.  
34  
35  
36 380 12. Muth C, Kirchner H, van den Akker M, Scherer M, Glasziou PP. Current guidelines  
37  
38 381 poorly address multimorbidity: pilot of the interaction matrix method. *J Clin Epidemiol*.  
39  
40 382 2014;67(11):1242-1250. doi:10.1016/j.jclinepi.2014.07.004  
41  
42  
43 383 13. Prados-Torres A, Poblador-Plou B, Gimeno-Miguel A, et al. Cohort Profile: The  
44  
45 384 Epidemiology of Chronic Diseases and Multimorbidity. The EpiChron Cohort Study. *Int*  
46  
47 385 *J Epidemiol*. 2018;47(2):382-384f. doi:10.1093/ije/dyx259  
48  
49  
50 386 14. Salisbury C, Johnson L, Purdy S, Valderas JM, Montgomery AA. Epidemiology and  
51  
52 387 impact of multimorbidity in primary care: a retrospective cohort study. *Br J Gen Pract*.  
53  
54 388 2011;61(582):e12-e21. doi:10.3399/bjgp11X548929  
55  
56  
57 389 15. Jacob J, Tost J, Miró Ò, et al. Impact of chronic obstructive pulmonary disease on  
58  
59  
60

- 1  
2  
3 390 clinical course after an episode of acute heart failure. EAHFE-COPD study. *Int J*  
4  
5 391 *Cardiol.* 2017;227:450-456. doi:10.1016/j.ijcard.2016.11.013  
6  
7  
8 392 16. Ahmed AA, Patel K, Nyaku MA, et al. Risk of Heart Failure and Death After Prolonged  
9  
10 393 Smoking Cessation: Role of Amount and Duration of Prior Smoking. *Circ Heart Fail.*  
11  
12 394 2015;8(4):694-701. doi:10.1161/CIRCHEARTFAILURE.114.001885  
13  
14  
15 395 17. Rutledge T, Reis VA, Linke SE, Greenberg BH, Mills PJ. Depression in Heart Failure. *J*  
16  
17 396 *Am Coll Cardiol.* 2006;48(8):1527-1537. doi:10.1016/j.jacc.2006.06.055  
18  
19  
20 397 18. Van der Kooy K, van Hout H, Marwijk H, Marten H, Stehouwer C, Beekman A.  
21  
22 398 Depression and the risk for cardiovascular diseases: systematic review and meta  
23  
24 399 analysis. *Int J Geriatr Psychiatry.* 2007;22(7):613-626. doi:10.1002/gps.1723  
25  
26  
27  
28 400 19. Nieminen MS, Harjola V-P, Hochadel M, et al. Gender related differences in patients  
29  
30 401 presenting with acute heart failure. Results from EuroHeart Failure Survey II. *Eur J*  
31  
32 402 *Heart Fail.* 2008;10(2):140-148. doi:10.1016/j.ejheart.2007.12.012  
33  
34  
35 403 20. Levy D, Kenchaiah S, Larson MG, et al. Long-Term Trends in the Incidence of and  
36  
37 404 Survival with Heart Failure. *N Engl J Med.* 2002;347(18):1397-1402.  
38  
39 405 doi:10.1056/NEJMoa020265  
40  
41  
42  
43 406 21. Senni M, Paulus WJ, Gavazzi A, et al. New strategies for heart failure with preserved  
44  
45 407 ejection fraction: the importance of targeted therapies for heart failure phenotypes. *Eur*  
46  
47 408 *Heart J.* 2014;35(40):2797-2815. doi:10.1093/eurheartj/ehu204  
48  
49  
50 409 22. Formiga F, Chivite D, Manito N, Casas S, Llopis F, Pujol R. Hospitalization due to acute  
51  
52 410 heart failure. Role of the precipitating factors. *Int J Cardiol.* 2007;120(2):237-241.  
53  
54 411 doi:10.1016/j.ijcard.2006.10.004  
55  
56  
57 412 23. Divo MJ, Celli BR, Poblador-Plou B, et al. Chronic Obstructive Pulmonary Disease  
58  
59 413 (COPD) as a disease of early aging: Evidence from the EpiChron Cohort. Loukides S,

- 1  
2  
3 414 ed. *PLoS One*. 2018;13(2):e0193143. doi:10.1371/journal.pone.0193143  
4  
5  
6 415 24. Ahmad T, Pencina MJ, Schulte PJ, et al. Clinical Implications of Chronic Heart Failure  
7  
8 416 Phenotypes Defined by Cluster Analysis. *J Am Coll Cardiol*. 2014;64(17):1765-1774.  
9  
10 417 doi:10.1016/j.jacc.2014.07.979  
11  
12  
13 418 25. Wang J, Sarnola K, Ruotsalainen S, et al. The metabolic syndrome predicts incident  
14  
15 419 congestive heart failure: A 20-year follow-up study of elderly finns. *Atherosclerosis*.  
16  
17 420 2010;210(1):237-242. doi:10.1016/j.atherosclerosis.2009.10.042  
18  
19  
20  
21 421 26. Perrone-Filardi P, Savarese G, Scarano M, et al. Prognostic impact of metabolic  
22  
23 422 syndrome in patients with chronic heart failure: Data from GISSI-HF trial. *Int J Cardiol*.  
24  
25 423 2015;178:85-90. doi:10.1016/j.ijcard.2014.10.094  
26  
27  
28 424 27. Ferrari R, Abergel H, Ford I, et al. Gender- and age-related differences in clinical  
29  
30 425 presentation and management of outpatients with stable coronary artery disease. *Int J*  
31  
32 426 *Cardiol*. 2013;167(6):2938-2943. doi:10.1016/j.ijcard.2012.08.013  
33  
34  
35  
36 427 28. Allen LA. Observational Process-Outcome Associations for Real-World Ambulatory  
37  
38 428 Heart Failure Care Moving Toward Clarity, or Clouding the View? *Circulation*.  
39  
40 429 2011;1581-1583. doi:10.1161/CIRCULATIONAHA.111.023283  
41  
42  
43 430 29. Angermann CE, Frey A, Ertl G. Cognition matters in cardiovascular disease and heart  
44  
45 431 failure. *Eur Heart J*. 2012;33(14):1721-1723. doi:10.1093/eurheartj/ehs128  
46  
47  
48 432 30. Jackson CA, Jones M, Tooth L, Mishra GD, Byles J, Dobson A. Multimorbidity patterns  
49  
50 433 are differentially associated with functional ability and decline in a longitudinal cohort of  
51  
52 434 older women. *Age Ageing*. 2015;44(5):810-816. doi:10.1093/ageing/afv095  
53  
54  
55 435  
56  
57  
58 436  
59  
60

437 **Table 1.** Demographic, health services use, and clinical description of patients with heart failure  
 438 (n= 14,670).

| Characteristics                           | Women (n= 8488)  | Men (n= 6182)    | p value |
|-------------------------------------------|------------------|------------------|---------|
| <b>Demographics</b>                       |                  |                  |         |
| Sex (%)                                   | 57.9 (57.1–58.7) | 42.1 (41.3–42.9) | <0.001  |
| Mean age (years)                          | 79.9 (79.6–80.1) | 75.2 (74.8–75.5) | <0.001  |
| Age interval (%)                          |                  |                  |         |
| ≤44 years                                 | 2.34 (2.02–2.67) | 3.87 (3.39–4.35) |         |
| 45–64 years                               | 6.03 (5.53–6.54) | 13.2 (12.3–14.0) |         |
| 65–84 years                               | 52.6 (51.5–53.6) | 58.7 (57.4–59.9) |         |
| ≥85 years                                 | 39.0 (38.0–40.1) | 24.3 (23.2–25.3) |         |
| Urban area (vs rural) (%)                 | 55.7 (54.6–56.7) | 52.3 (51.0–53.5) | <0.001  |
| Immigrants (%)                            | 0.95 (0.74–1.16) | 1.38 (1.08–1.67) | 0.017   |
| <b>Health services use during 2012</b>    |                  |                  |         |
| Visit to family physician                 |                  |                  |         |
| ≥1 visits (%)                             | 91.9 (91.3–92.5) | 90.0 (89.2–90.7) | <0.001  |
| Mean number of visits                     | 16.6 (16.3–16.9) | 16.5 (16.1–16.8) | 0.717   |
| Visit to specialists                      |                  |                  |         |
| ≥1 visits (%)                             | 78.9 (78.0–79.7) | 84.6 (83.7–85.5) | <0.001  |
| Mean number of visits                     | 6.45 (6.29–6.61) | 8.05 (7.83–8.26) | <0.001  |
| Hospital admissions                       |                  |                  |         |
| ≥1 admissions (%)                         | 39.9 (38.9–41.0) | 49.4 (48.1–50.6) | <0.001  |
| Mean number of admissions                 | 0.65 (0.63–0.68) | 0.90 (0.87–0.93) | <0.001  |
| Visit to emergency room                   |                  |                  |         |
| ≥1 visits (%)                             | 50.5 (49.4–51.6) | 54.8 (53.6–56.0) | <0.001  |
| Mean number of visits                     | 1.05 (1.02–1.09) | 1.23 (1.19–1.28) | <0.001  |
| <b>Clinical information</b>               |                  |                  |         |
| 3-year all-cause mortality (%)            | 33.3 (32.3–34.3) | 36.5 (35.3–37.7) | <0.001  |
| Multimorbidity* (%)                       | 98.2 (97.9–98.4) | 97.7 (97.3–98.1) | 0.068   |
| Mean number of diseases                   | 7.77 (7.69–7.85) | 7.87 (7.77–7.97) | 0.114   |
| Prevalence of comorbidities (%)           |                  |                  |         |
| Hypertension                              | 71.2 (70.2–72.1) | 65.0 (63.8–66.2) | <0.001  |
| Cardiac arrhythmia                        | 35.5 (34.4–36.5) | 42.6 (41.4–43.9) | <0.001  |
| Disorders of lipid metabolism             | 36.9 (35.8–37.9) | 37.6 (36.4–38.8) | 0.388   |
| Arthropathy                               | 36.8 (35.8–37.8) | 23.9 (22.8–25.0) | <0.001  |
| Diabetes                                  | 30.3 (29.4–31.3) | 32.3 (31.2–33.5) | 0.010   |
| Varicose veins of lower extremities       | 29.4 (28.4–30.4) | 11.8 (11.0–12.6) | <0.001  |
| Emphysema, chronic bronchitis, COPD       | 13.3 (12.6–14.0) | 32.8 (31.6–34.0) | <0.001  |
| Cardiovascular disorders, other           | 19.2 (18.4–20.0) | 24.0 (22.9–25.0) | <0.001  |
| Ischemic heart disease (excluding AMI†)   | 15.3 (14.5–16.0) | 24.6 (23.5–25.7) | <0.001  |
| Obesity                                   | 20.3 (19.4–21.1) | 17.6 (16.7–18.5) | <0.001  |
| Depression                                | 24.8 (23.8–25.7) | 10.9 (10.1–11.7) | <0.001  |
| Cataract, aphakia                         | 19.7 (18.9–20.6) | 16.9 (15.9–17.8) | <0.001  |
| Surgical aftercare                        | 15.8 (15.0–16.6) | 19.3 (18.3–20.2) | <0.001  |
| Cardiac valve disorders                   | 17.0 (16.2–17.8) | 17.5 (16.6–18.4) | 0.394   |
| Iron deficiency, other deficiency anemias | 17.3 (16.5–18.1) | 15.6 (14.7–16.5) | 0.007   |
| Osteoporosis                              | 23.1 (22.2–24.0) | 3.69 (3.22–4.16) | <0.001  |

|    |                               |                  |                  |        |
|----|-------------------------------|------------------|------------------|--------|
| 1  |                               |                  |                  |        |
| 2  |                               |                  |                  |        |
| 3  | Cerebrovascular disease       | 13.9 (13.2–14.7) | 14.3 (13.4–15.1) | 0.604  |
| 4  | Respiratory disorders, other  | 12.5 (11.8–13.2) | 16.1 (15.2–17.1) | <0.001 |
| 5  | Hypothyroidism                | 17.6 (16.8–18.4) | 6.44 (5.83–7.05) | <0.001 |
| 6  | Dementia and delirium         | 13.3 (12.6–14.0) | 8.44 (7.75–9.14) | <0.001 |
| 7  | Prostatic hypertrophy         | -                | 24.6 (23.5–25.7) | -      |
| 8  | Dermatitis and eczema         | 9.80 (9.17–10.4) | 10.3 (9.58–11.1) | 0.287  |
| 9  | Chronic renal failure         | 8.19 (7.60–8.77) | 12.3 (11.5–13.1) | <0.001 |
| 10 | Glaucoma                      | 10.4 (9.76–11.1) | 8.61 (7.91–9.30) | <0.001 |
| 11 | Deafness, hearing loss        | 9.57 (8.94–10.2) | 9.17 (8.45–9.89) | 0.419  |
| 12 | AMI                           | 5.84 (5.34–6.34) | 13.8 (12.9–14.6) | <0.001 |
| 13 | Chronic ulcer of the skin     | 10.2 (9.58–10.9) | 7.40 (6.74–8.04) | <0.001 |
| 14 | Hematologic disorders, other  | 7.94 (7.37–8.52) | 9.43 (8.70–10.2) | 0.002  |
| 15 | Asthma                        | 10.6 (10.0–11.3) | 4.69 (4.16–5.22) | <0.001 |
| 16 | Low back pain                 | 6.54 (6.01–7.06) | 6.10 (5.50–6.69) | 0.280  |
| 17 | Gout                          | 2.70 (2.35–3.04) | 10.5 (9.75–11.3) | <0.001 |
| 18 | Neurologic disorders, other   | 6.63 (6.10–7.16) | 5.10 (4.55–5.64) | <0.001 |
| 19 | Diverticular disease of colon | 5.75 (5.25–6.24) | 4.82 (4.29–5.35) | 0.014  |
| 20 | Other endocrine disorders     | 5.96 (5.46–6.47) | 3.80 (3.32–4.28) | <0.001 |

24 439 95% confidence intervals are displayed within brackets. Only comorbidities with a mean

25 440 prevalence equal to or greater than 5% are displayed.

26 441 \*Defined as having two or more chronic conditions from a list of 114 chronic diagnoses.

27 442 †Acute myocardial infarction.

28 443

29 444

30 445

31 446

32 447

33 448

34 449

35 450

36 451

452 **Table 2.** Multimorbidity patterns identified in women with heart failure (n= 8488). Each pattern  
 453 is represented by the comorbidities and their loading factors in the pattern.

| <b>Patterns</b>          | <b>Comorbidities</b>                    | <b>Loading factors</b> |
|--------------------------|-----------------------------------------|------------------------|
| <b>Cardiovascular</b>    | Cardiac arrhythmia                      | 0.80                   |
|                          | Cardiac valve disorders                 | 0.62                   |
|                          | Cardiovascular disorders, other         | 0.58                   |
|                          | Hematologic disorders, other            | 0.52                   |
|                          | Surgical aftercare                      | 0.33                   |
|                          | Cardiomyopathy                          | 0.32                   |
|                          | Chronic renal failure                   | 0.29                   |
| <b>Respiratory</b>       | Respiratory disorders, other            | 0.47                   |
|                          | Emphysema, chronic bronchitis, COPD     | 0.47                   |
|                          | Asthma                                  | 0.42                   |
|                          | Other endocrine disorders               | 0.37                   |
|                          | Chronic renal failure                   | 0.30                   |
|                          | Surgical aftercare                      | 0.25                   |
| <b>Metabolic</b>         | Diabetic retinopathy                    | 0.74                   |
|                          | Diabetes                                | 0.73                   |
|                          | Obesity                                 | 0.40                   |
|                          | Hypertension                            | 0.36                   |
|                          | Disorders of lipid metabolism           | 0.26                   |
| <b>Coronary-ischemic</b> | Acute myocardial infarction             | 0.76                   |
|                          | Ischemic heart disease (excluding AMI*) | 0.66                   |
|                          | Surgical aftercare                      | 0.30                   |
| <b>Degenerative</b>      | Varicose veins of lower extremities     | 0.53                   |
|                          | Arthropathy                             | 0.53                   |
|                          | Cataract, aphakia                       | 0.45                   |
|                          | Osteoporosis                            | 0.34                   |
|                          | Thrombophlebitis                        | 0.29                   |
|                          | Deafness, hearing loss                  | 0.26                   |
|                          | Obesity                                 | 0.25                   |
|                          | Hypertension                            | 0.25                   |
| <b>Neurovascular</b>     | Dementia and delirium                   | 0.76                   |
|                          | Chronic ulcer of the skin               | 0.48                   |
|                          | Cerebrovascular disease                 | 0.41                   |
|                          | Chronic renal failure                   | 0.28                   |
|                          | Respiratory disorders, other            | 0.25                   |

454 \*Acute myocardial infarction.

455

456

457

458

459 **Table 3.** Multimorbidity patterns identified in men with heart failure (n= 6182). Each pattern is  
 460 represented by the comorbidities and their loading factors in the pattern.

| <b>Patterns</b>           | <b>Comorbidities</b>                      | <b>Loading factors</b> |
|---------------------------|-------------------------------------------|------------------------|
| <b>Cardiovascular</b>     | Cardiovascular disorders, other           | 0.66                   |
|                           | Cardiac arrhythmia                        | 0.64                   |
|                           | Cardiac valve disorders                   | 0.58                   |
|                           | Cardiomyopathy                            | 0.55                   |
|                           | Surgical aftercare                        | 0.46                   |
|                           | Hematologic disorders, other              | 0.39                   |
|                           | Respiratory disorders, other              | 0.39                   |
|                           | Chronic renal failure                     | 0.33                   |
|                           | Iron deficiency, other deficiency anemias | 0.26                   |
| <b>Neurovascular</b>      | Dementia and delirium                     | 0.54                   |
|                           | Generalized atherosclerosis               | 0.52                   |
|                           | Peripheral vascular disease               | 0.46                   |
|                           | Chronic renal failure                     | 0.45                   |
|                           | Cerebrovascular disease                   | 0.43                   |
|                           | Respiratory disorders, other              | 0.43                   |
|                           | Chronic ulcer of the skin                 | 0.39                   |
|                           | Iron deficiency, other deficiency anemias | 0.39                   |
| <b>Metabolic</b>          | Obesity                                   | 0.71                   |
|                           | Diabetes                                  | 0.45                   |
|                           | Hypertension                              | 0.45                   |
|                           | Disorders of lipid metabolism             | 0.40                   |
|                           | Substance use                             | 0.31                   |
| <b>Coronary- ischemic</b> | Ischemic heart disease (excluding AMI*)   | 0.70                   |
|                           | Acute myocardial infarction               | 0.70                   |
|                           | Surgical aftercare                        | 0.36                   |
|                           | Disorders of lipid metabolism             | 0.36                   |
| <b>Degenerative</b>       | Arthropathy                               | 0.43                   |
|                           | Cataract, aphakia                         | 0.42                   |
|                           | Deafness, hearing loss                    | 0.39                   |
|                           | Glaucoma                                  | 0.31                   |
|                           | Varicose veins of lower extremities       | 0.30                   |
|                           | Dermatitis and eczema                     | 0.30                   |
|                           | Prostatic hypertrophy                     | 0.26                   |

461 \*Acute myocardial infarction.

462

463

464

465



466 **Table 4.** Prevalence of multimorbidity patterns identified in men (n= 6182) and women (n=  
 467 8488) with heart failure, and adjusted associations with hospitalization and death.

| Multimorbidity pattern | Prevalence (%) | Mean age (years) | Hospitalization (OR)* | p value | Death (HR)†      | p value |
|------------------------|----------------|------------------|-----------------------|---------|------------------|---------|
| <b>Women</b>           |                |                  |                       |         |                  |         |
| Cardiovascular         | 29.9           | 80.4             | 1.86 (1.66-2.08)      | <0.001  | 1.45 (1.33-1.58) | <0.001  |
| Metabolic              | 49.9           | 80.1             | 1.26 (1.13-1.39)      | <0.001  | 1.04 (0.97-1.13) | 0.284   |
| Coronary-ischemic      | 6.60           | 80.7             | 1.48 (1.23-1.79)      | <0.001  | 1.13 (0.99-1.30) | 0.061   |
| Neurovascular          | 13.6           | 84.1             | 1.12 (0.97-1.30)      | 0.117   | 1.62 (1.48-1.78) | <0.001  |
| Degenerative           | 64.0           | 81.1             | 1.19 (1.06-1.32)      | 0.002   | 0.70 (0.65-0.76) | <0.001  |
| Respiratory            | 16.9           | 81.0             | 1.71 (1.50-1.97)      | <0.001  | 1.53 (1.39-1.69) | <0.001  |
| <b>Men</b>             |                |                  |                       |         |                  |         |
| Cardiovascular         | 43.2           | 76.8             | 1.83 (1.62-2.07)      | <0.001  | 1.60 (1.46-1.76) | <0.001  |
| Metabolic              | 49.3           | 75.3             | 1.37 (1.22-1.53)      | <0.001  | 0.98 (0.90-1.07) | 0.695   |
| Coronary-ischemic      | 24.7           | 76.2             | 1.25 (1.10-1.43)      | 0.001   | 0.99 (0.90-1.09) | 0.818   |
| Neurovascular          | 22.2           | 79.9             | 1.62 (1.41-1.86)      | <0.001  | 1.74 (1.58-1.91) | <0.001  |
| Degenerative           | 29.2           | 80.2             | 1.03 (0.91-1.16)      | 0.687   | 0.75 (0.68-0.81) | <0.001  |

468 \*Odds ratio for having at least one hospitalization during the following year.

469 †Hazard ratio for all-cause death after three years of follow-up.

470

471

472

473

474

475

476

477

478

479

480

481

482

483

484

1  
2  
3 485 **Figure 1.** Kaplan-Meier survival curves in women (n= 8488) and men (n= 6182) with heart  
4  
5 486 failure according to the presence of different patterns of multimorbidity.  
6  
7 487 [Attached as pptx file]  
8  
9  
10  
11  
12  
13  
14  
15  
16  
17  
18  
19  
20  
21  
22  
23  
24  
25  
26  
27  
28  
29  
30  
31  
32  
33  
34  
35  
36  
37  
38  
39  
40  
41  
42  
43  
44  
45  
46  
47  
48  
49  
50  
51  
52  
53  
54  
55  
56  
57  
58  
59  
60

For peer review only

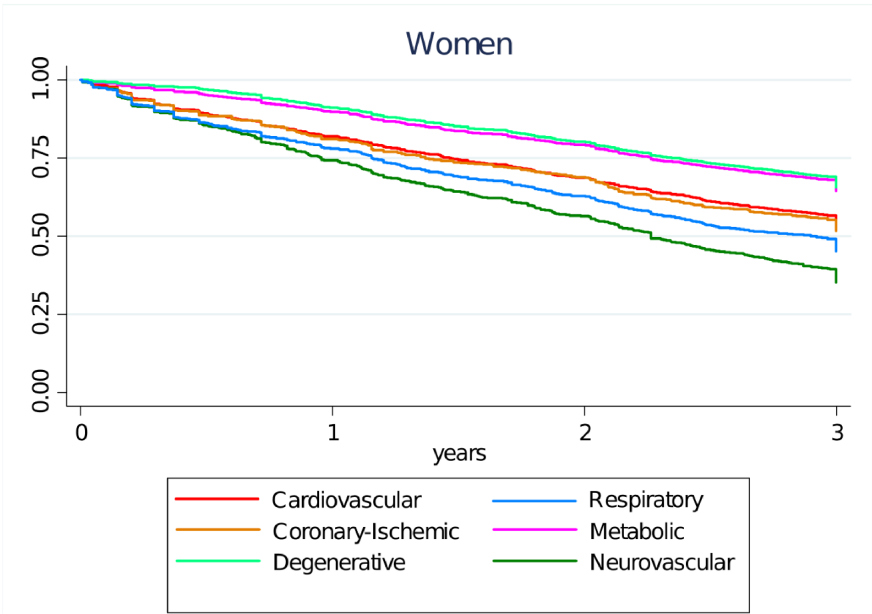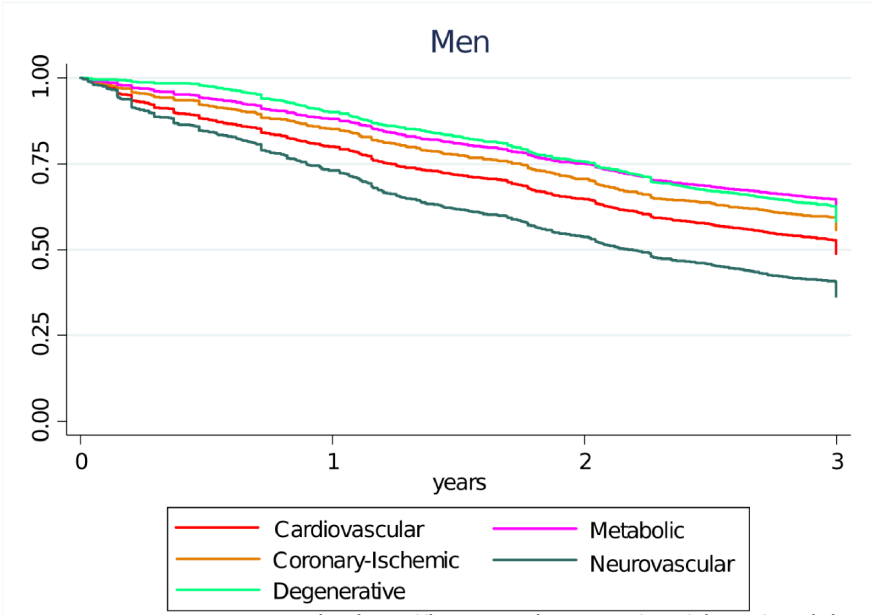

1  
2  
3  
4  
5  
6  
7  
8  
9  
10  
11  
12  
13  
14  
15  
16  
17  
18  
19  
20  
21  
22  
23  
24  
25  
26  
27  
28  
29  
30  
31  
32  
33  
34  
35  
36  
37  
38  
39  
40  
41

**STROBE 2007 (v4) Statement—Checklist of items that should be included in reports of *cross-sectional studies***

| Section/Topic                | Item # | Recommendation                                                                                                                                                                       | Reported on page # |
|------------------------------|--------|--------------------------------------------------------------------------------------------------------------------------------------------------------------------------------------|--------------------|
| <b>Title and abstract</b>    | 1      | (a) Indicate the study's design with a commonly used term in the title or the abstract                                                                                               | 1                  |
|                              |        | (b) Provide in the abstract an informative and balanced summary of what was done and what was found                                                                                  | 2-3                |
| <b>Introduction</b>          |        |                                                                                                                                                                                      |                    |
| Background/rationale         | 2      | Explain the scientific background and rationale for the investigation being reported                                                                                                 | 4-5                |
| Objectives                   | 3      | State specific objectives, including any prespecified hypotheses                                                                                                                     | 4-5                |
| <b>Methods</b>               |        |                                                                                                                                                                                      |                    |
| Study design                 | 4      | Present key elements of study design early in the paper                                                                                                                              | 5                  |
| Setting                      | 5      | Describe the setting, locations, and relevant dates, including periods of recruitment, exposure, follow-up, and data collection                                                      | 5                  |
| Participants                 | 6      | (a) Give the eligibility criteria, and the sources and methods of selection of participants                                                                                          | 5                  |
| Variables                    | 7      | Clearly define all outcomes, exposures, predictors, potential confounders, and effect modifiers. Give diagnostic criteria, if applicable                                             | 5-6                |
| Data sources/<br>measurement | 8*     | For each variable of interest, give sources of data and details of methods of assessment (measurement). Describe comparability of assessment methods if there is more than one group | 5-6                |
| Bias                         | 9      | Describe any efforts to address potential sources of bias                                                                                                                            | 5-6                |
| Study size                   | 10     | Explain how the study size was arrived at                                                                                                                                            | 5                  |
| Quantitative variables       | 11     | Explain how quantitative variables were handled in the analyses. If applicable, describe which groupings were chosen and why                                                         | 5-7                |
| Statistical methods          | 12     | (a) Describe all statistical methods, including those used to control for confounding                                                                                                | 6                  |
|                              |        | (b) Describe any methods used to examine subgroups and interactions                                                                                                                  | 6                  |
|                              |        | (c) Explain how missing data were addressed                                                                                                                                          | 6                  |
|                              |        | (d) If applicable, describe analytical methods taking account of sampling strategy                                                                                                   |                    |
|                              |        | (e) Describe any sensitivity analyses                                                                                                                                                |                    |
| <b>Results</b>               |        |                                                                                                                                                                                      |                    |

|                          |     |                                                                                                                                                                                                                                                                                                                                                                                                               |       |
|--------------------------|-----|---------------------------------------------------------------------------------------------------------------------------------------------------------------------------------------------------------------------------------------------------------------------------------------------------------------------------------------------------------------------------------------------------------------|-------|
| Participants             | 13* | (a) Report numbers of individuals at each stage of study—eg numbers potentially eligible, examined for eligibility, confirmed eligible, included in the study, completing follow-up, and analysed<br>(b) Give reasons for non-participation at each stage<br>(c) Consider use of a flow diagram                                                                                                               | 7     |
| Descriptive data         | 14* | (a) Give characteristics of study participants (eg demographic, clinical, social) and information on exposures and potential confounders<br>(b) Indicate number of participants with missing data for each variable of interest                                                                                                                                                                               | 7-8   |
| Outcome data             | 15* | Report numbers of outcome events or summary measures                                                                                                                                                                                                                                                                                                                                                          | 7-8   |
| Main results             | 16  | (a) Give unadjusted estimates and, if applicable, confounder-adjusted estimates and their precision (eg, 95% confidence interval). Make clear which confounders were adjusted for and why they were included<br>(b) Report category boundaries when continuous variables were categorized<br>(c) If relevant, consider translating estimates of relative risk into absolute risk for a meaningful time period | 7-8   |
| Other analyses           | 17  | Report other analyses done—eg analyses of subgroups and interactions, and sensitivity analyses                                                                                                                                                                                                                                                                                                                |       |
| <b>Discussion</b>        |     |                                                                                                                                                                                                                                                                                                                                                                                                               |       |
| Key results              | 18  | Summarise key results with reference to study objectives                                                                                                                                                                                                                                                                                                                                                      | 8-13  |
| Limitations              | 19  | Discuss limitations of the study, taking into account sources of potential bias or imprecision. Discuss both direction and magnitude of any potential bias                                                                                                                                                                                                                                                    | 3     |
| Interpretation           | 20  | Give a cautious overall interpretation of results considering objectives, limitations, multiplicity of analyses, results from similar studies, and other relevant evidence                                                                                                                                                                                                                                    | 8-13  |
| Generalisability         | 21  | Discuss the generalisability (external validity) of the study results                                                                                                                                                                                                                                                                                                                                         | 8-13  |
| <b>Other information</b> |     |                                                                                                                                                                                                                                                                                                                                                                                                               |       |
| Funding                  | 22  | Give the source of funding and the role of the funders for the present study and, if applicable, for the original study on which the present article is based                                                                                                                                                                                                                                                 | 13-14 |

\*Give information separately for cases and controls in case-control studies and, if applicable, for exposed and unexposed groups in cohort and cross-sectional studies.

**Note:** An Explanation and Elaboration article discusses each checklist item and gives methodological background and published examples of transparent reporting. The STROBE checklist is best used in conjunction with this article (freely available on the Web sites of PLoS Medicine at <http://www.plosmedicine.org/>, Annals of Internal Medicine at <http://www.annals.org/>, and Epidemiology at <http://www.epidem.com/>). Information on the STROBE Initiative is available at [www.strobe-statement.org](http://www.strobe-statement.org).

# BMJ Open

## Multimorbidity patterns in patients with heart failure: an observational Spanish study based on electronic health records.

|                                 |                                                                                                                                                                                                                                                                                                                                                                                                                                                                                                                                                                                                                                                                                                                                                                                                                                                                                                                                                                                                                                                        |
|---------------------------------|--------------------------------------------------------------------------------------------------------------------------------------------------------------------------------------------------------------------------------------------------------------------------------------------------------------------------------------------------------------------------------------------------------------------------------------------------------------------------------------------------------------------------------------------------------------------------------------------------------------------------------------------------------------------------------------------------------------------------------------------------------------------------------------------------------------------------------------------------------------------------------------------------------------------------------------------------------------------------------------------------------------------------------------------------------|
| Journal:                        | <i>BMJ Open</i>                                                                                                                                                                                                                                                                                                                                                                                                                                                                                                                                                                                                                                                                                                                                                                                                                                                                                                                                                                                                                                        |
| Manuscript ID                   | bmjopen-2019-033174.R1                                                                                                                                                                                                                                                                                                                                                                                                                                                                                                                                                                                                                                                                                                                                                                                                                                                                                                                                                                                                                                 |
| Article Type:                   | Original research                                                                                                                                                                                                                                                                                                                                                                                                                                                                                                                                                                                                                                                                                                                                                                                                                                                                                                                                                                                                                                      |
| Date Submitted by the Author:   | 13-Nov-2019                                                                                                                                                                                                                                                                                                                                                                                                                                                                                                                                                                                                                                                                                                                                                                                                                                                                                                                                                                                                                                            |
| Complete List of Authors:       | Gimeno-Miguel, A ; Aragon Health Sciences Institute, EpiChron Research Group. IIS Aragón; REDISSEC<br>Gracia Gutiérrez, Anyuli; Internal Medicine Service, Lozano Blesa University Hospital, Research Group on Heart Failure, IIS Aragón Poblador-Plou, Beatriz; Aragon Health Sciences Institute, EpiChron Research Group. IIS Aragón; REDISSEC<br>Coscollar-Santaliestra, Carlos; Primary Care Health Centre San Pablo, SALUD; EpiChron Research Group. IIS Aragón<br>Pérez-Calvo, J Ignacio; Internal Medicine Service, Lozano Blesa University Hospital, Research Group on Heart Failure. IIS Aragón; University of Zaragoza Faculty of Medicine<br>Divo, Miguel J; Brigham and Women ´s Hospital, Harvard Medical School, Pulmonary and Critical Care Division<br>Calderón-Larrañaga, Amaia; Karolinska Institutet<br>Prados-Torres, Alexandra; Aragon Health Sciences Institute, EpiChron Research Group. IIS Aragón; REDISSEC<br>Ruiz-Laiglesia, F.-J; Hospital Clínico Universitario Lozano Blesa, Research Group on Heart Failure. IIS Aragón |
| <b>Primary Subject Heading</b>: | Epidemiology                                                                                                                                                                                                                                                                                                                                                                                                                                                                                                                                                                                                                                                                                                                                                                                                                                                                                                                                                                                                                                           |
| Secondary Subject Heading:      | Public health                                                                                                                                                                                                                                                                                                                                                                                                                                                                                                                                                                                                                                                                                                                                                                                                                                                                                                                                                                                                                                          |
| Keywords:                       | Heart failure < CARDIOLOGY, Multimorbidity, Comorbidity, Patterns, Hospitalization                                                                                                                                                                                                                                                                                                                                                                                                                                                                                                                                                                                                                                                                                                                                                                                                                                                                                                                                                                     |
|                                 |                                                                                                                                                                                                                                                                                                                                                                                                                                                                                                                                                                                                                                                                                                                                                                                                                                                                                                                                                                                                                                                        |

SCHOLARONE™  
Manuscripts

1  
2  
3 **1 Multimorbidity patterns in patients with heart failure: an observational Spanish study**  
4  
5 **2 based on electronic health records.**  
6  
7

8 Antonio Gimeno-Miguel<sup>1\*</sup>, Anyuli Gracia Gutiérrez<sup>2\*</sup>, Beatriz Poblador-Plou<sup>1</sup>, Carlos Coscollar-  
9 Santaliestra<sup>3</sup>, J Ignacio Pérez-Calvo<sup>4</sup>, Miguel J Divo<sup>5</sup>, Amaia Calderón Larrañaga<sup>6</sup>, Alexandra  
10 Prados-Torres<sup>1†</sup>, Fernando J Ruiz-Laiglesia<sup>2†</sup>  
11  
12  
13  
14

15  
16 \* These authors contributed equally to this work and served as first co-authors.  
17

18  
19 †These authors contributed equally to this work and served as senior co-authors.  
20

21  
22 <sup>1</sup>EpiChron Research Group, Aragon Health Sciences Institute (IACS), IIS Aragón. Health  
23 Services Research on Chronic Patients Network (REDISSEC). Miguel Servet University  
24 Hospital, Zaragoza, Spain.  
25  
26  
27  
28

29 <sup>2</sup>Research Group on Heart Failure, IIS Aragón. Internal Medicine Service, Lozano Blesa  
30 University Hospital, Zaragoza, Spain.  
31  
32

33  
34 <sup>3</sup>EpiChron Research Group, IIS Aragón. Primary Care Health Centre San Pablo, SALUD,  
35 Zaragoza, Spain.  
36  
37  
38

39  
40 <sup>4</sup>Research Group on Heart Failure, IIS Aragón. Internal Medicine Service, Lozano Blesa  
41 University Hospital. Faculty of Medicine, University of Zaragoza, Zaragoza, Spain.  
42  
43

44  
45 <sup>5</sup>Pulmonary and Critical Care Division, Brigham and Women's Hospital, Harvard Medical  
46 School, Boston, Massachusetts, United States of America.  
47  
48

49  
50 <sup>6</sup>Aging Research Center, Karolinska Institutet, Stockholm, Sweden.  
51

52  
53 **Correspondence:** Antonio Gimeno Miguel. EpiChron Research Group, IACS. Miguel Servet  
54 University Hospital, Paseo Isabel la Católica 1-3. 50009, Zaragoza, Spain. Tel +34976765500.  
55  
56  
57 [agimenomi.iacs@aragon.es](mailto:agimenomi.iacs@aragon.es)  
58  
59  
60

1  
2  
3 **23 Abstract**  
4  
5

6 **24 Objectives:** To characterise the comorbidities of heart failure (HF) in men and women, to explore  
7  
8 **25** their clustering into multimorbidity patterns, and to measure the impact of such patterns on the  
9  
10 **26** risk of hospitalization and mortality.

11  
12  
13 **27 Design:** Observational retrospective population study based on electronic health records.  
14  
15

16 **28 Setting:** EpiChron Cohort (Aragón, Spain).  
17  
18

19 **29 Participants:** All the primary and hospital care patients of the EpiChron Cohort with a diagnosis  
20  
21 of HF on 1 January 2011 (i.e., 8488 women and 6182 men). We analysed all the chronic diseases  
22  
23 registered in patients' electronic health records until 31 December 2011.  
24  
25

26 **32 Primary outcome:** We performed an exploratory factor analysis to identify the multimorbidity  
27  
28 patterns in men and women, and logistic and Cox proportional-hazards regressions to investigate  
29  
30 the association between the patterns and the risk of hospitalization in 2012, and of three-year  
31  
32 mortality, respectively.  
33  
34

35 **36 Results:** Almost all HF patients (98%) had multimorbidity, with an average of 7.8 chronic  
37  
38 diseases per patient. We identified six different multimorbidity patterns, named cardiovascular,  
39  
40 neurovascular, coronary, metabolic, degenerative, and respiratory. The most prevalent were the  
41  
42 degenerative (64.0%) and cardiovascular (29.9%) patterns in women, and the metabolic (49.3%)  
43  
44 and cardiovascular (43.2%) patterns in men. Every pattern was associated with higher  
45  
46 hospitalization risks; and the cardiovascular, neurovascular and respiratory patterns significantly  
47  
48 increased the likelihood of three-year mortality.  
49  
50

51 **52 Conclusions:** Multimorbidity is the norm rather than the exception in patients with heart failure,  
53  
54 whose comorbidities tend to cluster together beyond simple chance in the form of multimorbidity  
55  
56 patterns that have different impact on health outcomes. This knowledge could be useful to better  
57  
58 understand common pathophysiological pathways underlying this condition and its  
59  
60



1  
2  
3 47 comorbidities, and the factors influencing the prognosis of men and women with HF. Further  
4  
5 48 large scale longitudinal studies are encouraged to confirm the existence of these patterns as well  
6  
7 49 as their differential impact on health outcomes.  
8  
9

10 50

11  
12  
13 51 **Keywords:** Heart failure; Multimorbidity; Comorbidity; Chronic disease; Hospitalization;  
14  
15 52 Mortality; Cohort  
16  
17

18 53

19  
20  
21 54 **Word count:** 3483  
22  
23  
24

25 55

26  
27  
28 56 **Article Summary**  
29

30  
31 57 ***Strengths and limitations of the study***  
32

33  
34 58 - This is a large-scale population-based study that included the primary and hospital care patients  
35  
36 59 of the reference population with a diagnosis of HF.  
37

38  
39 60 - The data in the cohort continuously underwent quality control check-ups to ensure its accuracy  
40  
41 61 and reliability for research purposes.  
42  
43

44  
45 62 - The cross-sectional characterisation of the multimorbidity patterns made it impossible to  
46  
47 63 understand the chronological relationship between the different risk factors and chronic diseases.  
48

49  
50 64 - Diagnoses were extracted from electronic health records that were not originally designed for  
51  
52 65 research, thus leading to a potential over or under-reporting of specific diseases.  
53  
54

55 66 - The estimation of the effect of multimorbidity patterns on health outcomes did not consider the  
56  
57 67 potential confounding role of socioeconomic factors or clinical parameters, like the ejection  
58  
59 68 fraction, which were not available in the study cohort.  
60

## 69 Introduction

70 Improvements in diagnostic and therapeutic procedures have decreased heart failure (HF)  
71 mortality rates, transforming this previously life-threatening condition into a chronic disease with  
72 a high burden of comorbidity, as confirmed by European HF registries.<sup>1</sup> HF patients are complex  
73 and present different phenotypes depending on age, sex, comorbidity, and pathophysiological and  
74 prognostic aspects.<sup>2</sup> Both cardiovascular and non-cardiovascular comorbidities are determining  
75 factors in the differentiation of these phenotypes and their impact on health outcomes. In fact, HF  
76 patients with non-cardiovascular comorbidities show increased disease burdens, severity, risk of  
77 hospitalization and death.<sup>3,4</sup>

78         Recent studies have examined the most prevalent comorbidities in HF patients and their  
79 prognostic impact on mortality rates and hospital readmissions.<sup>2,5,6</sup> However, although the  
80 clustering of chronic diseases into multimorbidity patterns has already been demonstrated in the  
81 general population,<sup>7</sup> most studies still focus on isolated comorbidities, without considering the  
82 interrelations among them. Some of the few studies addressing multimorbidity in HF patients  
83 restrict their analyses to the most frequently co-occurring combinations of two or three  
84 comorbidities,<sup>8</sup> while others are conducted in relatively small samples<sup>9</sup>. Moreover, the  
85 methodological approaches in these studies in terms of data sources, studied comorbidities, and  
86 statistical analysis techniques vary considerably.<sup>3,8-10</sup> Thus, there is still a need to perform studies  
87 on real patients from primary care, where multimorbidity is most frequently dealt with, and to  
88 address the sex/gender perspective of this disease and its comorbidities.

89         The Academy of Medical Sciences recently highlighted the importance of investigating  
90 which multimorbidity patterns cause the greatest burden of disease, and the determinants of the  
91 most common clusters of conditions.<sup>11</sup> Improving our knowledge on the systematic associations  
92 among HF comorbidities is of great interest, as some of them are known to share common  
93 biological and socioeconomic risk factors on which prevention strategies could be based.  
94 Furthermore, the identification and clinical characterisation of multimorbidity patterns in men

1  
2  
3 95 and women with HF, and the study of their potential impact on negative health outcomes (e.g.,  
4  
5 96 risk of death and hospitalization) could shed light on new pathophysiological pathways. These  
6  
7 97 pathways could help guide the development of clinical practice guidelines better adapted to  
8  
9 98 patients with HF based on their sex and comorbidities.<sup>12</sup>  
10

11  
12 99 This large-scale population study based on electronic health records from real primary  
13  
14 100 and hospital care patients aimed to characterise the comorbidities of HF in men and women, to  
15  
16 101 explore their clustering into multimorbidity patterns, and to measure the impact of said patterns  
17  
18 102 on negative health outcomes.  
19

## 20 21 22 103 **Methods**

### 23 24 25 104 *Design and study population*

26  
27  
28 105 We conducted a retrospective observational study based on the EpiChron Cohort, which links  
29  
30 106 demographic, clinical and health-outcome-related information for all public health system users  
31  
32 107 of the Spanish region of Aragón. A description of the cohort profile and of the data sources was  
33  
34 108 published elsewhere.<sup>13</sup> This cohort was conformed in 2011 and it included 1,253,292 people at  
35  
36 109 baseline (approximately 95% of the total inhabitants of Aragón). For this study, we selected all  
37  
38 110 patients with HF diagnosis in their primary or hospital electronic health records on 1 January 2011  
39  
40 111 and followed-up on them for three years.  
41

### 42 43 44 112 *Study variables*

45  
46  
47 113 For each patient, we analysed demographic data (i.e., age, sex, area of residence, immigration  
48  
49 114 status), hospital admissions during 2012, all chronic condition diagnoses from primary and/or  
50  
51 115 hospital care, and all-cause mortality until 31 December 2014. Diagnoses were extracted from the  
52  
53 116 electronic health records of both primary and hospital care levels, and included all active episodes  
54  
55 117 between 1 January 2011 and 31 December 2011, even if a healthcare professional had recorded  
56  
57 118 them before the initial date. Diseases were originally coded according to the International  
58  
59 119 Classification of Primary Care (ICPC) (in primary care settings) or the International Classification  
60

1  
2  
3 120 of Diseases, Ninth Revision, Clinical Modification (ICD-9-CM) (in hospital settings), and  
4  
5 121 subsequently grouped into 260 mutually exclusive Expanded Diagnostic Clusters (EDCs) through  
6  
7 122 the Johns Hopkins ACG® System (version 11.0, The Johns Hopkins University, Baltimore, MD,  
8  
9 123 US).<sup>14</sup> We included every patient with the CAR05 EDC code, as well as the ICPC and ICD-9-  
10  
11 124 CM codes for HF, and considered all 114 possible EDCs previously established as chronic by  
12  
13 125 Salisbury et al.<sup>15</sup> for the analysis. Multimorbidity was defined as the presence of two or more  
14  
15  
16 126 EDCs from Salisbury's list.

17  
18  
19 127 This study complies with the Declaration of Helsinki, and the Clinical Research Ethics  
20  
21 128 Committee of Aragón (CEICA) approved the research protocol (PI18/082). The CEICA waived  
22  
23 129 the requirement to obtain informed consent from patients since all the information was  
24  
25 130 anonymised.

### 26 27 28 131 *Statistical analyses*

29  
30  
31 132 All our analyses were stratified by sex. First, we performed a descriptive analysis on demographic  
32  
33 133 and clinical information of the population with HF. We compared means and frequencies using  
34  
35 134 Student's t-test and the chi-squared test, respectively, with their corresponding 95% confidence  
36  
37 135 intervals.

38  
39  
40 136 Second, we applied an exploratory factor analysis to identify the existence of non-random  
41  
42 137 associations among chronic diseases in men and women. To facilitate the epidemiological and  
43  
44 138 clinical interpretation of the results, we only included in the analysis those chronic comorbidities  
45  
46 139 from Salisbury's list with a prevalence  $\geq 5\%$  in each sex. The methodology followed was  
47  
48 140 described elsewhere.<sup>7</sup> Briefly, EDCs were coded as binary variables (present/absent), and a factor  
49  
50 141 analysis based on a tetrachoric correlation matrix was performed to determine which diagnoses  
51  
52 142 comprised each factor. We used the principal factor method for the extraction of the factors, and  
53  
54 143 a scree plot in combination with clinical criteria to determine the number of factors to extract.  
55  
56 144 The EDCs with factor scores  $\geq 0.25$  within a pattern were considered to be part of that  
57  
58 145 multimorbidity pattern, so that the same EDC could be present in more than one cluster. Model

1  
2  
3 146 goodness-of-fit and sample adequacy were calculated through the proportions of cumulative  
4  
5 147 variance and the Kaiser-Meyer-Olkin (KMO) parameter. After performing the factor analysis,  
6  
7 148 three clinical experts (FRL, CCS, and APT) proposed and agreed upon the denomination of the  
8  
9 149 resulting patterns according to the most relevant diseases and those with the highest loading factor  
10  
11 150 within each pattern. Individuals were subsequently assigned to one or more of the described  
12  
13 151 patterns of multimorbidity if they had at least two of the diseases that comprised the pattern (in  
14  
15 152 addition to HF), as described by Prados et al.<sup>7</sup>  
16  
17  
18

19 153 Finally, we applied logistic and Cox proportional-hazards regressions to calculate the risk  
20  
21 154 of having at least one hospitalization during 2012 and of three-year mortality, respectively,  
22  
23 155 depending on the multimorbidity pattern suffered by the individual (compared to having no  
24  
25 156 patterns). Patient age (continuous variable) and all the multimorbidity patterns were included as  
26  
27 157 independent variables in the models. We used Kaplan-Meier survival curves to represent and  
28  
29 158 compare survival rates of individuals with specific multimorbidity patterns, which were also used  
30  
31 159 to test for the proportional hazard assumption.  
32  
33

34 160 We conducted all statistical analyses using STATA (Version 12.0, StataCorp LLC,  
35  
36 161 College Station, TX, US). Statistical significance was set at  $p < 0.05$ .  
37  
38

### 39 162 *Patient and Public Involvement*

40  
41  
42  
43 163 Patients and public were not involved in this study.  
44  
45

### 46 164 **Results**

47  
48  
49 165 A total of 14,670 patients from the EpiChron Cohort had a HF diagnosis in 2011, representing  
50  
51 166 around 1.1% of the total population of Aragón. The study population is described in Table 1.  
52  
53 167 Women predominated over men (57.9% vs 42.1%,  $p < 0.001$ ) and were older on average (79.9 vs  
54  
55 168 75.2 years,  $p < 0.001$ ) mainly due to a higher proportion of people aged  $\geq 85$  years. The cumulative  
56  
57 169 mortality rate throughout the three-year follow-up was higher in men than in women (36.5% vs  
58  
59 170 33.3 %,  $p < 0.001$ ), and the same pattern was observed for hospital admissions.  
60

1  
2  
3 171 In our study, almost all patients with HF (98%) suffered from multimorbidity, with an  
4  
5 172 average disease burden of 7.8 chronic diseases per patient (HF included). These figures are higher  
6  
7 173 than those observed in the reference cohort (38% and 1.7 chronic diseases/patient, respectively).  
8  
9 174 The most prevalent HF comorbidities were similar in women and in men, and specifically were  
10  
11 175 hypertension (71.2% vs 65.0%), dyslipidemia (36.9% vs 37.6%), arthropathy (36.8% vs 23.9%),  
12  
13 176 cardiac arrhythmia (35.5% vs 42.6%) and diabetes (30.3% vs 32.3%). Except for hypertension,  
14  
15 177 which was more frequent in women, cardiovascular comorbidities (i.e., ischemic heart disease  
16  
17 178 and arrhythmias) as well as COPD, were more prevalent in men. Arthropathy, varicose veins of  
18  
19 179 lower extremities, obesity, osteoporosis, dementia and depression were also highly prevalent in  
20  
21 180 HF patients, especially in women.  
22  
23  
24

25 181 We identified and described six multimorbidity patterns in women, which resulted from  
26  
27 182 the factorial analysis, namely cardiovascular, respiratory, metabolic, coronary-ischemic,  
28  
29 183 degenerative, and neurovascular patterns. Men only showed five patterns, which were similar to  
30  
31 184 those observed in women with the exception of the respiratory pattern. Tables 2 and 3 detail the  
32  
33 185 compositions of the multimorbidity patterns in women and men, respectively. In women, these  
34  
35 186 patterns explained up to 40.5% of the cumulative total variance, with a KMO of 0.753. In men,  
36  
37 187 the patterns explained up to 37.3% of the cumulative total variance, with a KMO of 0.761.  
38  
39  
40

41 188 A high proportion of the study population was assigned to these patterns, with prevalence  
42  
43 189 rates ranging from 13.5% (neurovascular) to 64.0% (degenerative) in women, and from 22.2%  
44  
45 190 (neurovascular) to 49.3% (metabolic) in men. The prevalence and impact on health outcomes of  
46  
47 191 such multimorbidity patterns is described in Table 4. In general, all the multimorbidity patterns  
48  
49 192 were associated with an increased risk of hospitalization during the following year (12-86%  
50  
51 193 increase) in both men and women compared with the absence of the pattern, except for the  
52  
53 194 degenerative pattern in women. The cardiovascular, neurovascular and respiratory patterns  
54  
55 195 significantly increased the likelihood of three-year mortality (45-74% increase) in both sexes. The  
56  
57 196 Kaplan-Meier survival curves of population with HF according to different multimorbidity  
58  
59 197 patterns are presented in Figure 1.  
60

1  
2  
3 198 **Discussion**

4  
5  
6 199 ***Comorbidity of Heart Failure***

7  
8  
9 200 The higher morbidity burden found in our population with HF when compared with the general  
10  
11 201 population of the EpiChron Cohort<sup>13</sup> could probably be explained by the differences in their age  
12  
13 202 and sex distributions (mean age of 77.9 vs 44.2 years, and 57.9% vs 50.5% of women,  
14  
15 203 respectively). The fact that almost the entire population with HF suffered from multimorbidity  
16  
17 204 (i.e., at least one comorbidity in addition to HF) could be due in part to our operationalization of  
18  
19 205 multimorbidity, whereby an exceptionally comprehensive list of chronic conditions was  
20  
21 206 considered. Although most studies agree in defining multimorbidity as the co-occurrence of two  
22  
23 207 or more chronic conditions, different classification systems are frequently used and the number  
24  
25 208 of diseases considered varies considerably from 5 to 335 conditions among studies.<sup>16,17</sup> This lack  
26  
27 209 of international consensus regarding the definition of multimorbidity hinders the comparison of  
28  
29 210 results among studies, and the estimations on its prevalence and health impact.

30  
31  
32  
33 211 In our study, ischemic heart disease and arrhythmias were the most prevalent HF  
34  
35 212 comorbidities in men, and hypertension was the most frequent in women, as previously  
36  
37 213 described.<sup>1</sup> The higher prevalence of COPD in men compared to women was probably due to the  
38  
39 214 higher rates of smoking among Spanish men.<sup>18</sup> While the estimated prevalence of COPD in the  
40  
41 215 general Spanish population is 15% in men and 6% in women,<sup>19</sup> these figures were almost doubled  
42  
43 216 in our HF cohort, approaching the 25.6% described in the EAHFE-COPD Study on acute HF  
44  
45 217 patients.<sup>20</sup> The higher COPD prevalence might be explained because a) both COPD and HF share  
46  
47 218 similar symptoms; b) beta-blockers (indicated for HF) and bronchodilators (indicated for COPD)  
48  
49 219 have an effect on both pathologies; and c) heart congestion alters pulmonary function tests, among  
50  
51 220 others. In this regard, a study found that congestive heart failure is strongly associated with  
52  
53 221 comorbidities that may lead to the misdiagnosis, and more specifically over-diagnosis of COPD  
54  
55 222 in these patients.<sup>21</sup>

1  
2  
3 223 Comorbid depression, which was predominantly observed in women, presented a  
4  
5 224 prevalence 2-3 times higher than that observed in the general population.<sup>13</sup> Its prevalence is  
6  
7 225 consistent with that reported in the meta-analytic review by Rutledge et al,<sup>22</sup> where the mean  
8  
9 226 prevalence of depression in HF patients was 21.5%. Depression has been associated to worse  
10  
11 227 prognosis in patients with cardiovascular disease in terms of mortality, hospital admissions and  
12  
13 228 functional status.<sup>1</sup> However, its role as a potential risk factor for the development of HF is less  
14  
15 229 consistent; so far, this has only been proven in women and in older patients with systolic  
16  
17 230 hypertension.<sup>23</sup> The greater prevalence of hypothyroidism observed in HF patients compared to  
18  
19 231 that of the population aged  $\geq 65$  years from the same reference cohort (3.1% in men; 12.7% in  
20  
21 232 women)<sup>13</sup> could be partially explained by the structural and hemodynamic secondary effects of  
22  
23 233 the lack of thyroid hormones on the heart. The higher prevalence of hypothyroidism observed in  
24  
25 234 women compared to men is congruent with the results from the Euro Heart Failure Survey II.<sup>19</sup>

26  
27  
28  
29 235 The clinical composition of the multimorbidity patterns found in the study and their  
30  
31 236 impact on mortality and hospitalization is discussed below. In general, the number and type of  
32  
33 237 patterns obtained in men and women were very similar, although their prevalence, composition,  
34  
35 238 and impact on health outcomes differed moderately.

### 38 39 239 ***Cardiovascular pattern***

40  
41  
42 240 This pattern mainly included cardiac arrhythmia, cardiac valve disorders and hematologic  
43  
44 241 disorders (e.g., anticoagulant therapy), as well as chronic renal failure and anemia. Kidney and  
45  
46 242 heart diseases share common risk factors and they are interrelated through adaptive mechanisms.  
47  
48 243 Moreover, chronic failure of both organs, volume overload, increased levels of cytokines,  
49  
50 244 malabsorption syndrome, suppression of the bone marrow and anticoagulant therapy increase the  
51  
52 245 frequency of anemia in HF patients.<sup>24</sup> The presence of these comorbidities in the cardiovascular  
53  
54 246 but not in the coronary-ischemic pattern could imply a greater deterioration in HF patients  
55  
56 247 suffering from the former pattern. In fact, patients presenting the cardiovascular pattern showed  
57  
58 248 significantly higher risk of hospitalization and mortality in both sexes. The strong association of  
59  
60



1  
2  
3 249 this pattern with hospitalization could probably be due to the hemodynamic dysfunction produced  
4  
5 250 by cardiac arrhythmias and anemia, which often leads to decompensation and subsequent  
6  
7 251 hospitalization.<sup>25</sup>  
8  
9

10 252 ***Respiratory pattern***

11  
12  
13 253 The absence of a specific respiratory pattern in men is remarkable, as is the absence of COPD in  
14  
15 254 the rest of patterns, considering the acknowledged association between COPD and ischemic heart  
16  
17 255 disease,<sup>26</sup> both related to HF, and the high prevalence of COPD particularly in men. Ahmad et  
18  
19 256 al<sup>27</sup> found that COPD appeared in several clusters of patients with HF, especially in those with  
20  
21 257 higher morbidity burden, which also clustered with ischemic heart disease, cerebrovascular  
22  
23 258 disease, smoking and male sex. In our study, COPD did not come up as part of any pattern in  
24  
25 259 men, suggesting a lack of discriminative power of this disease in terms of disease clustering in  
26  
27 260 men with HF. Nevertheless, this pattern had the second-highest impact on both mortality and  
28  
29 261 hospitalization in women.  
30  
31

32  
33 262 ***Metabolic pattern***

34  
35  
36 263 This pattern, which was the most prevalent in both sexes, included risk factors for the so-called  
37  
38 264 metabolic syndrome. This pattern has been consistently identified across studies carried out in the  
39  
40 265 general population, and in 18% of patients with HF, with no gender differences.<sup>28</sup> The fact that  
41  
42 266 only two diseases had to be present to assign patients to the metabolic pattern could justify its  
43  
44 267 higher prevalence. When this pattern was restricted to presenting three or more conditions, its  
45  
46 268 prevalence decreased to 21.3% in women and 22.1% in men, which is closer to previously  
47  
48 269 published prevalence rates. The absence of an association of this pattern with increased three-  
49  
50 270 year mortality both in men and women is in line with existing literature, probably due to reverse  
51  
52 271 epidemiology whereby HF patients with cardiovascular risk factors have better prognosis.<sup>29</sup>  
53  
54  
55

56 272 ***Coronary-ischemic pattern***

1  
2  
3 273 This pattern was, along with the metabolic pattern, one of the most consistent patterns from a  
4  
5 274 clinical standpoint. The evolution from micro- and macro-vascular endothelial damage caused by  
6  
7 275 arteriosclerosis to myocardial injury represents a pathophysiological continuum underlying this  
8  
9 276 pattern. However, our study could not test this hypothesis since the medical history of HF patients  
10  
11 277 was unknown. Previous studies have corroborated the late appearance of ischemic heart disease  
12  
13 278 in women with diabetes and hypertension, whereas, in men, this condition appears earlier and in  
14  
15 279 association to myocardial infarction and smoking.<sup>30</sup> The absence of association with three-year  
16  
17 280 mortality may be explained by the effectiveness of beta-blockers, aldosterone antagonists and  
18  
19 281 angiotensin-converting enzyme inhibitors on reducing the risk of sudden death and prolonging  
20  
21 282 survival in patients with HF,<sup>31</sup> although this hypothesis needs further investigation based on  
22  
23 283 longer follow-up periods.

#### 27 284 *Neurovascular pattern*

285 This pattern included conditions related to arteriosclerotic damage in target organs (i.e., kidneys,  
286  
287 extremities and brain) and thromboembolisms secondary to cardiac arrhythmia. The presence of  
288  
289 dementia in this pattern is not unexpected. The relationship between cognitive impairment and  
290  
291 HF is well known, and is secondary to low cerebral perfusion, atrial fibrillation, and brain changes  
292  
293 consequence of the neuro-hormonal adaptation mechanisms underlying HF.<sup>32</sup> Patients with this  
294  
295 pattern had among the highest risks of three-year mortality. However, the lack of impact on  
296  
297 women's hospitalization risk was unexpected, especially bearing in mind that women suffering  
298  
299 from this pattern were considerably older.

#### 293 294 *Degenerative pattern*

295 This pattern, predominantly described in women, included degenerative conditions such as  
296  
297 arthropathy, cataracts, aphakia, and hearing loss. Although this pattern would be expected to  
298  
299 entail a greater degree of dependency than others, in the longitudinal nine-year study of Jackson  
300  
301 et al,<sup>33</sup> the neurological and cardiovascular patterns derived in greater limitations on activities of  
302  
303 daily living compared to the degenerative pattern identified by these authors. The co-occurrence

1  
2  
3 299 of venous disease, thrombophlebitis, osteoporosis and dermatitis in this pattern could be  
4  
5 300 conditioned by the physical activity restrictions of patients with HF. This pattern was the only one  
6  
7 301 associated to a decreased risk of three-year mortality in both men and women, maybe due to the  
8  
9 302 lower clinical severity of the conditions conforming it, some of which are typical of older age.  
10  
11

12 303 Overall, our results reflect the importance of taking the complete constellation of diseases  
13  
14 304 that surrounds HF into account in both the study and its clinical management. Comorbidities have  
15  
16 305 been found to cluster similarly in both sexes; however, some relevant differences have emerged  
17  
18 306 in the composition of the patterns and its impact on health outcomes. Although exploratory, these  
19  
20 307 findings could give us important clues on which specific comorbidities or disease combinations  
21  
22 308 should be given more attention in men and women with HF in order to better direct disease  
23  
24 309 prevention and control strategies. Specifically, it seems that clinicians should pay particular  
25  
26 310 attention to the appearance of neurovascular and other cardiovascular comorbidities in both men  
27  
28 311 and women, and to respiratory diseases in the case of women, to try to minimize their impact on  
29  
30 312 health outcomes.  
31  
32

### 33 313 *Strengths and limitations of the study*

34  
35  
36  
37 314 The main strength of this study is that it represents a large-scale population including real primary  
38  
39 315 and hospital care patients with a diagnosis of HF. Moreover, HF comorbidities were  
40  
41 316 comprehensively studied by using an exhaustive list of chronic conditions, and not only the most  
42  
43 317 prevalent or severe ones.  
44  
45  
46

47 318 One of the main limitations of the study is the cross-sectional characterisation of the  
48  
49 319 multimorbidity patterns that makes it impossible to understand the chronological relationship  
50  
51 320 between the different risk factors and chronic diseases. Furthermore, this work is exploratory in  
52  
53 321 its approach and methodology. The estimation of the effect of multimorbidity patterns on health  
54  
55 322 outcomes did not consider the potential confounding role of socioeconomic factors or clinical  
56  
57 323 parameters, like the ejection fraction, which were not available in the study cohort. Other  
58  
59 324 variables such as lifestyle habits (e.g., smoking and drinking behaviours) were also unavailable,  
60

1  
2  
3 325 and diagnoses were based on real data extracted from electronic health records that were not  
4  
5 326 originally designed for research, thus leading to a potential over or under-reporting of specific  
6  
7 327 diseases. In this regard, data in the EpiChron cohort undergoes continuous quality control check-  
8  
9 328 ups that ensure its accuracy and reliability for research purposes.

### 12 329 **Conclusion**

15 330 This study confirmed that multimorbidity is the norm rather than the exception in patients with  
16  
17 331 heart failure, and that comorbidities tend to cluster together beyond simple chance in the form of  
18  
19 332 multimorbidity patterns that have different impact on health outcomes in men and women. This  
20  
21 333 knowledge could be useful to better understand common pathophysiological pathways underlying  
22  
23 334 this disease and its comorbidities, and the factors that influence the prognosis of these patients.  
24  
25 335 Further large scale longitudinal studies are encouraged to confirm the existence of these patterns  
26  
27 336 as well as their differential impact on health outcomes.

### 31 337 **Author Contributions**

34 338 APT and FJRL were the Principal Investigators of the study. AGM, AGG, APT, and FJRL  
35  
36 339 contributed to the design of the research. AGM and BPP performed the statistical analyses. APT,  
37  
38 340 FJRL, AGG, and CCS interpreted and discussed the results. AGM and AGG prepared the first  
39  
40 341 draft of the manuscript. ACL, MJD, and JIPC made important contributions to the revision of the  
41  
42 342 manuscript. All authors read and approved the final version of the manuscript.

### 46 343 **Funding**

49 344 This work was supported by Gobierno de Aragón [B01\_17R] and the European Regional  
50  
51 345 Development Fund 'Construyendo Europa desde Aragón'. The funders played no role in the  
52  
53 346 design of the study, collection, analysis, and interpretation of data, or preparation of the  
54  
55 347 manuscript.

### 58 348 **Acknowledgements**

1  
2  
3 349 The authors sincerely thank Eva Giménez Labrador for her statistical support and Kevin Blik  
4  
5 350 Bueno for his writing assistance.  
6  
7

8 351 **Competing interests**  
9

10  
11 352 None declared.  
12  
13

14 353 **Patient consent for publication**  
15

16  
17 354 Not required.  
18  
19

20 355 **Ethics approval**  
21

22  
23  
24 356 This study was approved by the Clinical Research Ethics Committee of Aragón (CEICA,  
25  
26 357 PI18/082).  
27  
28

29 358 **Availability of data**  
30

31  
32 359 The dataset generated and analysed during the current study is not publicly available, but is  
33  
34 360 available from the corresponding author on reasonable request.  
35  
36

37 361 **References**  
38

39  
40 362 1. Lawson CA, Solis-Trapala I, Dahlstrom U, *et al.* Comorbidity health pathways in heart failure  
41  
42 363 patients: A sequences-of-regressions analysis using cross-sectional data from 10,575 patients in  
43  
44 364 the Swedish Heart Failure Registry. *PLOS Med*  
45  
46 365 2018;**15**:e1002540doi:10.1371/journal.pmed.1002540.  
47  
48

49  
50 366 2. Kajimoto K, Sato N, Takano T, investigators of the Acute Decompensated Heart Failure  
51  
52 367 Syndromes (ATTEND) registry. Relation of Left Ventricular Ejection Fraction and Clinical  
53  
54 368 Features or Co-morbidities to Outcomes Among Patients Hospitalized for Acute Heart Failure  
55  
56 369 Syndromes. *Am J Cardiol* 2015;**115**:334–40doi:10.1016/j.amjcard.2014.11.007.  
57  
58

59 370 3. Horiuchi Y, Tanimoto S, Latif AHMM, *et al.* Identifying novel phenotypes of acute heart  
60

- 1  
2  
3 371 failure using cluster analysis of clinical variables. *Int J Cardiol* 2018;**262**:57–  
4  
5 372 63doi:10.1016/j.ijcard.2018.03.098.  
6  
7  
8 373 4. Manemann SM, Chamberlain AM, Boyd CM, *et al.* Multimorbidity in Heart Failure: Effect on  
9  
10 374 Outcomes. *J Am Geriatr Soc* 2016;**64**:1469–74doi:10.1111/jgs.14206.  
11  
12  
13 375 5. Shah SJ, Katz DH, Selvaraj S, *et al.* Phenomapping for Novel Classification of Heart Failure  
14  
15 376 With Preserved Ejection Fraction. *Circulation* 2015;**131**:269–  
16  
17 377 79doi:10.1161/CIRCULATIONAHA.114.010637.  
18  
19  
20 378 6. van Deursen VM, Urso R, Laroche C, *et al.* Co-morbidities in patients with heart failure: an  
21  
22 379 analysis of the European Heart Failure Pilot Survey. *Eur J Heart Fail* 2014;**16**:103–  
23  
24 380 11doi:10.1002/ejhf.30.  
25  
26  
27 381 7. Prados-Torres A, Poblador-Plou B, Calderón-Larrañaga A, *et al.* Multimorbidity patterns in  
28  
29 382 primary care: interactions among chronic diseases using factor analysis. *PLoS One*  
30  
31 383 2012;**7**:e32190.  
32  
33  
34 384 8. Saczynski JS, Go AS, Magid DJ, *et al.* Patterns of comorbidity in older adults with heart failure:  
35  
36 385 the Cardiovascular Research Network PRESERVE study. *J Am Geriatr Soc* 2013;**61**:26–  
37  
38 386 33doi:10.1111/jgs.12062.  
39  
40  
41 387 9. Chamberlain AM, St Sauver JL, Gerber Y, *et al.* Multimorbidity in Heart Failure: A  
42  
43 388 Community Perspective. *Am J Med* 2015;**128**:38–45doi:10.1016/j.amjmed.2014.08.024.  
44  
45  
46 389 10. Leva F, Bitonti D. Network analysis of comorbidity patterns in heart failure patients using  
47  
48 390 administrative data. *Epidemiol Biostat Public Heal* 2018;**15**doi:10.2427/12779.  
49  
50  
51 391 11. The Academy of Medical Sciences. Multimorbidity: a priority for global health research.  
52  
53 392 London (UK); 2018<https://acmedsci.ac.uk/file-download/82222577>. Accessed 24 Apr 2018.  
54  
55  
56 393 12. Muth C, Kirchner H, van den Akker M, Scherer M, Glasziou PP. Current guidelines poorly  
57  
58  
59  
60

- 1  
2  
3 394 address multimorbidity: pilot of the interaction matrix method. *J Clin Epidemiol* 2014;**67**:1242–  
4  
5 395 50doi:10.1016/j.jclinepi.2014.07.004.  
6  
7  
8 396 13. Prados-Torres A, Poblador-Plou B, Gimeno-Miguel A, *et al.* Cohort Profile: The  
9  
10 397 Epidemiology of Chronic Diseases and Multimorbidity. The EpiChron Cohort Study. *Int J*  
11  
12 398 *Epidemiol* 2018;**47**:382-384doi:10.1093/ije/dyx259.  
13  
14  
15 399 14. The Johns Hopkins ACG® System. <https://www.hopkinsacg.org/>. Accessed 8 Aug 2017.  
16  
17  
18 400 15. Salisbury C, Johnson L, Purdy S, Valderas JM, Montgomery AA. Epidemiology and impact  
19  
20 401 of multimorbidity in primary care: a retrospective cohort study. *Br J Gen Pract* 2011;**61**:e12-  
21  
22 402 21doi:10.3399/bjgp11X548929.  
23  
24  
25 403 16. Fortin M, Stewart M, Poitras M, Maddocks H. A Systematic Review of Prevalence Studies  
26  
27 404 on Multimorbidity: Toward a More Uni- form Methodology. *Ann Fam Med* 2012;**10**:142–  
28  
29 405 51.  
30  
31  
32 406 17. van den Akker M, Buntinx F, Metsemakers JF, Roos S, Knottnerus JA. Multimorbidity in  
33  
34 407 general practice: prevalence, incidence, and determinants of co-occurring chronic and recurrent  
35  
36 408 diseases. *J Clin.Epidemiol.* **51**:367–75.  
37  
38  
39 409 18. Fernandez E, Schiaffino A, Borràs JM, Shafey O, Villalbí JR, La Vecchia C. Prevalence of  
40  
41 410 cigarette smoking by birth cohort among males and females in Spain, 1910–1990. *Eur J Cancer*  
42  
43 411 *Prev* 2003;**12**:57–62doi:10.1097/00008469-200302000-00009.  
44  
45  
46 412 19. Miravittles M, Soriano JB, Garcia-Rio F, *et al.* Prevalence of COPD in Spain: impact of  
47  
48 413 undiagnosed COPD on quality of life and daily life activities. *Thorax* 2009;**64**:863–  
49  
50 414 8doi:10.1136/thx.2009.115725.  
51  
52  
53 415 20. Jacob J, Tost J, Miró Ò, *et al.* Impact of chronic obstructive pulmonary disease on clinical  
54  
55 416 course after an episode of acute heart failure. EAHFE-COPD study. *Int J Cardiol* 2017;**227**:450–  
56  
57 417 6doi:10.1016/j.ijcard.2016.11.013.  
58  
59  
60

- 1  
2  
3 418 21. Spero K, Bayasi G, Beaudry L, Barber KR, Khorfan F. Overdiagnosis of COPD in  
4  
5 419 hospitalized patients. *Int J Chron Obstruct Pulmon Dis* 2017;**12**:2417–  
6  
7 420 23doi:10.2147/COPD.S139919.
- 8  
9  
10 421 22. Rutledge T, Reis VA, Linke SE, Greenberg BH, Mills PJ. Depression in Heart Failure. *J Am*  
11  
12 422 *Coll Cardiol* 2006;**48**:1527–37doi:10.1016/j.jacc.2006.06.055.
- 13  
14  
15 423 23. Van der Kooy K, van Hout H, Marwijk H, Marten H, Stehouwer C, Beekman A. Depression  
16  
17 424 and the risk for cardiovascular diseases: systematic review and meta analysis. *Int J Geriatr*  
18  
19 425 *Psychiatry* 2007;**22**:613–26doi:10.1002/gps.1723.
- 20  
21  
22 426 24. Senni M, Paulus WJ, Gavazzi A, *et al.* New strategies for heart failure with preserved ejection  
23  
24 427 fraction: the importance of targeted therapies for heart failure phenotypes. *Eur Heart J*  
25  
26 428 2014;**35**:2797–815doi:10.1093/eurheartj/ehu204.
- 27  
28  
29 429 25. Formiga F, Chivite D, Manito N, Casas S, Llopis F, Pujol R. Hospitalization due to acute  
30  
31 430 heart failure. Role of the precipitating factors. *Int J Cardiol* 2007;**120**:237–  
32  
33 431 41doi:10.1016/j.ijcard.2006.10.004.
- 34  
35  
36 432 26. Divo MJ, Celli BR, Poblador-Plou B, *et al.* Chronic Obstructive Pulmonary Disease (COPD)  
37  
38 433 as a disease of early aging: Evidence from the EpiChron Cohort. *PLoS One*  
39  
40 434 2018;**13**:e0193143doi:10.1371/journal.pone.0193143.
- 41  
42  
43 435 27. Ahmad T, Pencina MJ, Schulte PJ, *et al.* Clinical Implications of Chronic Heart Failure  
44  
45 436 Phenotypes Defined by Cluster Analysis. *J Am Coll Cardiol* 2014;**64**:1765–  
46  
47 437 74doi:10.1016/j.jacc.2014.07.979.
- 48  
49  
50 438 28. Wang J, Sarnola K, Ruotsalainen S, *et al.* The metabolic syndrome predicts incident  
51  
52 439 congestive heart failure: A 20-year follow-up study of elderly finns. *Atherosclerosis*  
53  
54 440 2010;**210**:237–42doi:10.1016/j.atherosclerosis.2009.10.042.
- 55  
56  
57 441 29. Perrone-Filardi P, Savarese G, Scarano M, *et al.* Prognostic impact of metabolic syndrome in



- 1  
2  
3 442 patients with chronic heart failure: Data from GISSI-HF trial. *Int J Cardiol* 2015;**178**:85–  
4  
5 443 90doi:10.1016/j.ijcard.2014.10.094.  
6  
7  
8 444 30. Ferrari R, Abergel H, Ford I, *et al*. Gender- and age-related differences in clinical presentation  
9  
10 445 and management of outpatients with stable coronary artery disease. *Int J Cardiol* 2013;**167**:2938–  
11  
12 446 43doi:10.1016/j.ijcard.2012.08.013.  
13  
14  
15 447 31. Allen LA. Observational Process-Outcome Associations for Real-World Ambulatory Heart  
16  
17 448 Failure Care Moving Toward Clarity, or Clouding the View? *Circulation* 2011;:1581–  
18  
19 449 3doi:10.1161/CIRCULATIONAHA.111.023283.  
20  
21  
22  
23 450 32. Angermann CE, Frey A, Ertl G. Cognition matters in cardiovascular disease and heart failure.  
24  
25 451 *Eur Heart J* 2012;**33**:1721–3doi:10.1093/eurheartj/ehs128.  
26  
27  
28 452 33. Jackson CA, Jones M, Tooth L, Mishra GD, Byles J, Dobson A. Multimorbidity patterns are  
29  
30 453 differentially associated with functional ability and decline in a longitudinal cohort of older  
31  
32 454 women. *Age Ageing* 2015;**44**:810–6doi:10.1093/ageing/afv095.  
33  
34  
35 455  
36  
37  
38 456  
39  
40  
41  
42  
43  
44  
45  
46  
47  
48  
49  
50  
51  
52  
53  
54  
55  
56  
57  
58  
59  
60

457 **Table 1.** Demographic and clinical description of patients with heart failure (n= 14,670).

| Characteristics                           | Women (n= 8488)  | Men (n= 6182)    | p value |
|-------------------------------------------|------------------|------------------|---------|
| <b>Demographics</b>                       |                  |                  |         |
| Sex (%)                                   | 57.9 (57.1–58.7) | 42.1 (41.3–42.9) | <0.001  |
| Mean age (years)                          | 79.9 (79.6–80.1) | 75.2 (74.8–75.5) | <0.001  |
| Age interval (%)                          |                  |                  |         |
| ≤44 years                                 | 2.34 (2.02–2.67) | 3.87 (3.39–4.35) |         |
| 45–64 years                               | 6.03 (5.53–6.54) | 13.2 (12.3–14.0) |         |
| 65–84 years                               | 52.6 (51.5–53.6) | 58.7 (57.4–59.9) |         |
| ≥85 years                                 | 39.0 (38.0–40.1) | 24.3 (23.2–25.3) |         |
| Urban area (vs rural) (%)                 | 55.7 (54.6–56.7) | 52.3 (51.0–53.5) | <0.001  |
| Immigrants (%)                            | 0.95 (0.74–1.16) | 1.38 (1.08–1.67) | 0.017   |
| <b>Clinical information</b>               |                  |                  |         |
| 3-year all-cause mortality (%)            | 33.3 (32.3–34.3) | 36.5 (35.3–37.7) | <0.001  |
| Multimorbidity* (%)                       | 98.2 (97.9–98.4) | 97.7 (97.3–98.1) | 0.068   |
| Mean number of diseases                   | 7.77 (7.69–7.85) | 7.87 (7.77–7.97) | 0.114   |
| Prevalence of comorbidities (%)           |                  |                  |         |
| Hypertension                              | 71.2 (70.2–72.1) | 65.0 (63.8–66.2) | <0.001  |
| Cardiac arrhythmia                        | 35.5 (34.4–36.5) | 42.6 (41.4–43.9) | <0.001  |
| Disorders of lipid metabolism             | 36.9 (35.8–37.9) | 37.6 (36.4–38.8) | 0.388   |
| Arthropathy                               | 36.8 (35.8–37.8) | 23.9 (22.8–25.0) | <0.001  |
| Diabetes                                  | 30.3 (29.4–31.3) | 32.3 (31.2–33.5) | 0.010   |
| Varicose veins of lower extremities       | 29.4 (28.4–30.4) | 11.8 (11.0–12.6) | <0.001  |
| Emphysema, chronic bronchitis, COPD       | 13.3 (12.6–14.0) | 32.8 (31.6–34.0) | <0.001  |
| Cardiovascular disorders, other           | 19.2 (18.4–20.0) | 24.0 (22.9–25.0) | <0.001  |
| Ischemic heart disease (excluding AMI†)   | 15.3 (14.5–16.0) | 24.6 (23.5–25.7) | <0.001  |
| Obesity                                   | 20.3 (19.4–21.1) | 17.6 (16.7–18.5) | <0.001  |
| Depression                                | 24.8 (23.8–25.7) | 10.9 (10.1–11.7) | <0.001  |
| Cataract, aphakia                         | 19.7 (18.9–20.6) | 16.9 (15.9–17.8) | <0.001  |
| Surgical aftercare                        | 15.8 (15.0–16.6) | 19.3 (18.3–20.2) | <0.001  |
| Cardiac valve disorders                   | 17.0 (16.2–17.8) | 17.5 (16.6–18.4) | 0.394   |
| Iron deficiency, other deficiency anemias | 17.3 (16.5–18.1) | 15.6 (14.7–16.5) | 0.007   |
| Osteoporosis                              | 23.1 (22.2–24.0) | 3.69 (3.22–4.16) | <0.001  |
| Cerebrovascular disease                   | 13.9 (13.2–14.7) | 14.3 (13.4–15.1) | 0.604   |
| Respiratory disorders, other              | 12.5 (11.8–13.2) | 16.1 (15.2–17.1) | <0.001  |
| Hypothyroidism                            | 17.6 (16.8–18.4) | 6.44 (5.83–7.05) | <0.001  |
| Dementia and delirium                     | 13.3 (12.6–14.0) | 8.44 (7.75–9.14) | <0.001  |
| Prostatic hypertrophy                     | -                | 24.6 (23.5–25.7) | -       |
| Dermatitis and eczema                     | 9.80 (9.17–10.4) | 10.3 (9.58–11.1) | 0.287   |
| Chronic renal failure                     | 8.19 (7.60–8.77) | 12.3 (11.5–13.1) | <0.001  |
| Glaucoma                                  | 10.4 (9.76–11.1) | 8.61 (7.91–9.30) | <0.001  |
| Deafness, hearing loss                    | 9.57 (8.94–10.2) | 9.17 (8.45–9.89) | 0.419   |
| AMI                                       | 5.84 (5.34–6.34) | 13.8 (12.9–14.6) | <0.001  |
| Chronic ulcer of the skin                 | 10.2 (9.58–10.9) | 7.40 (6.74–8.04) | <0.001  |
| Hematologic disorders, other              | 7.94 (7.37–8.52) | 9.43 (8.70–10.2) | 0.002   |
| Asthma                                    | 10.6 (10.0–11.3) | 4.69 (4.16–5.22) | <0.001  |
| Low back pain                             | 6.54 (6.01–7.06) | 6.10 (5.50–6.69) | 0.280   |
| Gout                                      | 2.70 (2.35–3.04) | 10.5 (9.75–11.3) | <0.001  |

|   |                               |                  |                  |        |
|---|-------------------------------|------------------|------------------|--------|
| 1 |                               |                  |                  |        |
| 2 |                               |                  |                  |        |
| 3 | Neurologic disorders, other   | 6.63 (6.10–7.16) | 5.10 (4.55–5.64) | <0.001 |
| 4 | Diverticular disease of colon | 5.75 (5.25–6.24) | 4.82 (4.29–5.35) | 0.014  |
| 5 | Other endocrine disorders     | 5.96 (5.46–6.47) | 3.80 (3.32–4.28) | <0.001 |
| 6 |                               |                  |                  |        |

7 458 95% confidence intervals are displayed within brackets. Only comorbidities with a mean

8  
9 459 prevalence equal to or greater than 5% are displayed.

10  
11 460 \*Defined as having two or more chronic conditions from a list of 114 chronic diagnoses.

12  
13 461 †Acute myocardial infarction.

14  
15 462

16  
17  
18 463

19  
20  
21 464

22  
23  
24 465

25  
26  
27 466

28  
29  
30 467

31  
32  
33 468

34  
35  
36 469

37  
38  
39 470

40  
41  
42 471

43  
44  
45 472

46  
47  
48 473

49  
50  
51 474

52  
53  
54 475

55  
56  
57 476

58  
59  
60

477 **Table 2.** Multimorbidity patterns identified in women with heart failure (n= 8488). Each pattern  
 478 is represented by the comorbidities and their loading factors in the pattern.

| Patterns                 | Comorbidities                           | Loading factors |
|--------------------------|-----------------------------------------|-----------------|
| <b>Cardiovascular</b>    | Cardiac arrhythmia                      | 0.80            |
|                          | Cardiac valve disorders                 | 0.62            |
|                          | Cardiovascular disorders, other         | 0.58            |
|                          | Hematologic disorders, other            | 0.52            |
|                          | Surgical aftercare                      | 0.33            |
|                          | Cardiomyopathy                          | 0.32            |
|                          | Chronic renal failure                   | 0.29            |
| <b>Respiratory</b>       | Respiratory disorders, other            | 0.47            |
|                          | Emphysema, chronic bronchitis, COPD     | 0.47            |
|                          | Asthma                                  | 0.42            |
|                          | Other endocrine disorders               | 0.37            |
|                          | Chronic renal failure                   | 0.30            |
|                          | Surgical aftercare                      | 0.25            |
| <b>Metabolic</b>         | Diabetic retinopathy                    | 0.74            |
|                          | Diabetes                                | 0.73            |
|                          | Obesity                                 | 0.40            |
|                          | Hypertension                            | 0.36            |
|                          | Disorders of lipid metabolism           | 0.26            |
| <b>Coronary-ischemic</b> | Acute myocardial infarction             | 0.76            |
|                          | Ischemic heart disease (excluding AMI*) | 0.66            |
|                          | Surgical aftercare                      | 0.30            |
| <b>Degenerative</b>      | Varicose veins of lower extremities     | 0.53            |
|                          | Arthropathy                             | 0.53            |
|                          | Cataract, aphakia                       | 0.45            |
|                          | Osteoporosis                            | 0.34            |
|                          | Thrombophlebitis                        | 0.29            |
|                          | Deafness, hearing loss                  | 0.26            |
|                          | Obesity                                 | 0.25            |
| Hypertension             | 0.25                                    |                 |
| <b>Neurovascular</b>     | Dementia and delirium                   | 0.76            |
|                          | Chronic ulcer of the skin               | 0.48            |
|                          | Cerebrovascular disease                 | 0.41            |
|                          | Chronic renal failure                   | 0.28            |
|                          | Respiratory disorders, other            | 0.25            |

479 \*Acute myocardial infarction.

480

481 **Table 3.** Multimorbidity patterns identified in men with heart failure (n= 6182). Each pattern is  
 482 represented by the comorbidities and their loading factors in the pattern.

| <b>Patterns</b>           | <b>Comorbidities</b>                      | <b>Loading factors</b> |
|---------------------------|-------------------------------------------|------------------------|
| <b>Cardiovascular</b>     | Cardiovascular disorders, other           | 0.66                   |
|                           | Cardiac arrhythmia                        | 0.64                   |
|                           | Cardiac valve disorders                   | 0.58                   |
|                           | Cardiomyopathy                            | 0.55                   |
|                           | Surgical aftercare                        | 0.46                   |
|                           | Hematologic disorders, other              | 0.39                   |
|                           | Respiratory disorders, other              | 0.39                   |
|                           | Chronic renal failure                     | 0.33                   |
|                           | Iron deficiency, other deficiency anemias | 0.26                   |
| <b>Neurovascular</b>      | Dementia and delirium                     | 0.54                   |
|                           | Generalized atherosclerosis               | 0.52                   |
|                           | Peripheral vascular disease               | 0.46                   |
|                           | Chronic renal failure                     | 0.45                   |
|                           | Cerebrovascular disease                   | 0.43                   |
|                           | Respiratory disorders, other              | 0.43                   |
|                           | Chronic ulcer of the skin                 | 0.39                   |
|                           | Iron deficiency, other deficiency anemias | 0.39                   |
| <b>Metabolic</b>          | Obesity                                   | 0.71                   |
|                           | Diabetes                                  | 0.45                   |
|                           | Hypertension                              | 0.45                   |
|                           | Disorders of lipid metabolism             | 0.40                   |
|                           | Substance use                             | 0.31                   |
| <b>Coronary- ischemic</b> | Ischemic heart disease (excluding AMI*)   | 0.70                   |
|                           | Acute myocardial infarction               | 0.70                   |
|                           | Surgical aftercare                        | 0.36                   |
|                           | Disorders of lipid metabolism             | 0.36                   |
| <b>Degenerative</b>       | Arthropathy                               | 0.43                   |
|                           | Cataract, aphakia                         | 0.42                   |
|                           | Deafness, hearing loss                    | 0.39                   |
|                           | Glaucoma                                  | 0.31                   |
|                           | Varicose veins of lower extremities       | 0.30                   |
|                           | Dermatitis and eczema                     | 0.30                   |
|                           | Prostatic hypertrophy                     | 0.26                   |

483 \*Acute myocardial infarction.

484

485 **Table 4.** Prevalence of multimorbidity patterns identified in men (n= 6182) and women (n= 8488)  
 486 with heart failure, and adjusted associations with hospitalization and death.

| <b>Multimorbidity pattern</b> | <b>Prevalence (%)</b> | <b>Mean age (years)</b> | <b>Hospitalization (OR)*</b> | <b>p value</b> | <b>Death (HR)†</b> | <b>p value</b> |
|-------------------------------|-----------------------|-------------------------|------------------------------|----------------|--------------------|----------------|
| <b>Women</b>                  |                       |                         |                              |                |                    |                |
| Cardiovascular                | 29.9                  | 80.4                    | 1.86 (1.66-2.08)             | <0.001         | 1.45 (1.33-1.58)   | <0.001         |
| Metabolic                     | 49.9                  | 80.1                    | 1.26 (1.13-1.39)             | <0.001         | 1.04 (0.97-1.13)   | 0.284          |
| Coronary-ischemic             | 6.60                  | 80.7                    | 1.48 (1.23-1.79)             | <0.001         | 1.13 (0.99-1.30)   | 0.061          |
| Neurovascular                 | 13.6                  | 84.1                    | 1.12 (0.97-1.30)             | 0.117          | 1.62 (1.48-1.78)   | <0.001         |
| Degenerative                  | 64.0                  | 81.1                    | 1.19 (1.06-1.32)             | 0.002          | 0.70 (0.65-0.76)   | <0.001         |
| Respiratory                   | 16.9                  | 81.0                    | 1.71 (1.50-1.97)             | <0.001         | 1.53 (1.39-1.69)   | <0.001         |
| <b>Men</b>                    |                       |                         |                              |                |                    |                |
| Cardiovascular                | 43.2                  | 76.8                    | 1.83 (1.62-2.07)             | <0.001         | 1.60 (1.46-1.76)   | <0.001         |
| Metabolic                     | 49.3                  | 75.3                    | 1.37 (1.22-1.53)             | <0.001         | 0.98 (0.90-1.07)   | 0.695          |
| Coronary-ischemic             | 24.7                  | 76.2                    | 1.25 (1.10-1.43)             | 0.001          | 0.99 (0.90-1.09)   | 0.818          |
| Neurovascular                 | 22.2                  | 79.9                    | 1.62 (1.41-1.86)             | <0.001         | 1.74 (1.58-1.91)   | <0.001         |
| Degenerative                  | 29.2                  | 80.2                    | 1.03 (0.91-1.16)             | 0.687          | 0.75 (0.68-0.81)   | <0.001         |

487 \*Odds ratio for having at least one hospitalization during the following year (compared to not  
 488 having the pattern).

489 †Hazard ratio for all-cause death after three years of follow-up (compared to not having the  
 490 pattern).

491

1  
2  
3  
4  
5  
6  
7  
8  
9  
10  
11  
12  
13  
14  
15  
16  
17  
18  
19  
20  
21  
22  
23  
24  
25  
26  
27  
28  
29  
30  
31  
32  
33  
34  
35  
36  
37  
38  
39  
40  
41  
42  
43  
44  
45  
46  
47  
48  
49  
50  
51  
52  
53  
54  
55  
56  
57  
58  
59  
60

492 **Figure 1.** Kaplan-Meier survival curves in men (n= 6182) and women (n= 8488) with heart failure  
493 according to the presence of different patterns of multimorbidity.  
494 [Attached as TIFF file]

For peer review only

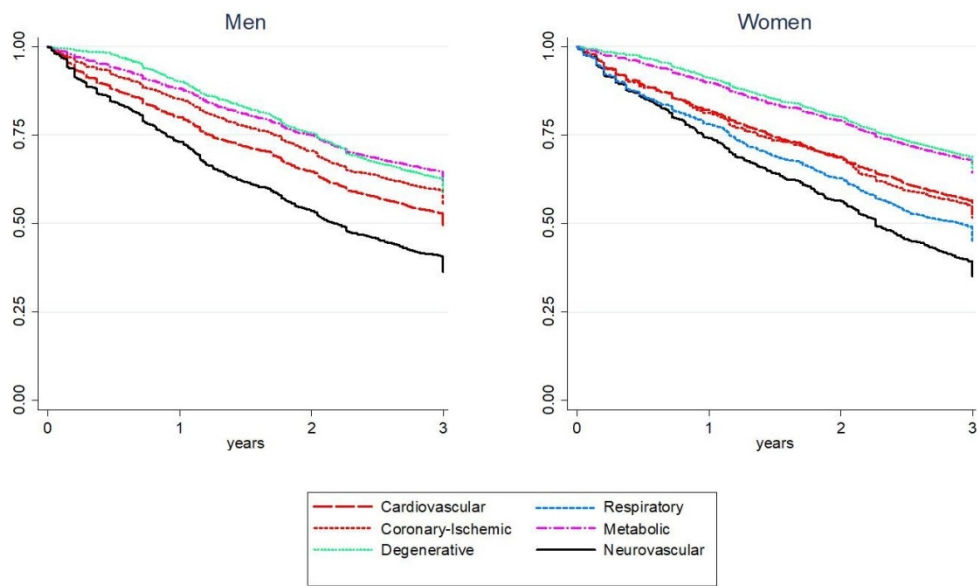

Figure 1. Kaplan-Meier survival curves in men (n= 6182) and women (n= 8488) with heart failure according to the presence of different patterns of multimorbidity.

228x146mm (150 x 150 DPI)



STROBE 2007 (v4) Statement—Checklist of items that should be included in reports of cross-sectional studies

| Section/Topic                | Item # | Recommendation                                                                                                                                                                       | Reported on page # |
|------------------------------|--------|--------------------------------------------------------------------------------------------------------------------------------------------------------------------------------------|--------------------|
| Title and abstract           | 1      | (a) Indicate the study’s design with a commonly used term in the title or the abstract                                                                                               | 1                  |
|                              |        | (b) Provide in the abstract an informative and balanced summary of what was done and what was found                                                                                  | 2-3                |
| <b>Introduction</b>          |        |                                                                                                                                                                                      |                    |
| Background/rationale         | 2      | Explain the scientific background and rationale for the investigation being reported                                                                                                 | 4-5                |
| Objectives                   | 3      | State specific objectives, including any prespecified hypotheses                                                                                                                     | 4-5                |
| <b>Methods</b>               |        |                                                                                                                                                                                      |                    |
| Study design                 | 4      | Present key elements of study design early in the paper                                                                                                                              | 5                  |
| Setting                      | 5      | Describe the setting, locations, and relevant dates, including periods of recruitment, exposure, follow-up, and data collection                                                      | 5                  |
| Participants                 | 6      | (a) Give the eligibility criteria, and the sources and methods of selection of participants                                                                                          | 5                  |
| Variables                    | 7      | Clearly define all outcomes, exposures, predictors, potential confounders, and effect modifiers. Give diagnostic criteria, if applicable                                             | 5-6                |
| Data sources/<br>measurement | 8*     | For each variable of interest, give sources of data and details of methods of assessment (measurement). Describe comparability of assessment methods if there is more than one group | 5-6                |
| Bias                         | 9      | Describe any efforts to address potential sources of bias                                                                                                                            | 5-6                |
| Study size                   | 10     | Explain how the study size was arrived at                                                                                                                                            | 5                  |
| Quantitative variables       | 11     | Explain how quantitative variables were handled in the analyses. If applicable, describe which groupings were chosen and why                                                         | 5-7                |
| Statistical methods          | 12     | (a) Describe all statistical methods, including those used to control for confounding                                                                                                | 6                  |
|                              |        | (b) Describe any methods used to examine subgroups and interactions                                                                                                                  | 6                  |
|                              |        | (c) Explain how missing data were addressed                                                                                                                                          | 6                  |
|                              |        | (d) If applicable, describe analytical methods taking account of sampling strategy                                                                                                   |                    |
|                              |        | (e) Describe any sensitivity analyses                                                                                                                                                |                    |
| <b>Results</b>               |        |                                                                                                                                                                                      |                    |

|                          |     |                                                                                                                                                                                                                                                                                                                                                                                                               |       |
|--------------------------|-----|---------------------------------------------------------------------------------------------------------------------------------------------------------------------------------------------------------------------------------------------------------------------------------------------------------------------------------------------------------------------------------------------------------------|-------|
| Participants             | 13* | (a) Report numbers of individuals at each stage of study—eg numbers potentially eligible, examined for eligibility, confirmed eligible, included in the study, completing follow-up, and analysed<br>(b) Give reasons for non-participation at each stage<br>(c) Consider use of a flow diagram                                                                                                               | 7     |
| Descriptive data         | 14* | (a) Give characteristics of study participants (eg demographic, clinical, social) and information on exposures and potential confounders<br>(b) Indicate number of participants with missing data for each variable of interest                                                                                                                                                                               | 7-8   |
| Outcome data             | 15* | Report numbers of outcome events or summary measures                                                                                                                                                                                                                                                                                                                                                          | 7-8   |
| Main results             | 16  | (a) Give unadjusted estimates and, if applicable, confounder-adjusted estimates and their precision (eg, 95% confidence interval). Make clear which confounders were adjusted for and why they were included<br>(b) Report category boundaries when continuous variables were categorized<br>(c) If relevant, consider translating estimates of relative risk into absolute risk for a meaningful time period | 7-8   |
| Other analyses           | 17  | Report other analyses done—eg analyses of subgroups and interactions, and sensitivity analyses                                                                                                                                                                                                                                                                                                                |       |
| <b>Discussion</b>        |     |                                                                                                                                                                                                                                                                                                                                                                                                               |       |
| Key results              | 18  | Summarise key results with reference to study objectives                                                                                                                                                                                                                                                                                                                                                      | 8-13  |
| Limitations              | 19  | Discuss limitations of the study, taking into account sources of potential bias or imprecision. Discuss both direction and magnitude of any potential bias                                                                                                                                                                                                                                                    | 3     |
| Interpretation           | 20  | Give a cautious overall interpretation of results considering objectives, limitations, multiplicity of analyses, results from similar studies, and other relevant evidence                                                                                                                                                                                                                                    | 8-13  |
| Generalisability         | 21  | Discuss the generalisability (external validity) of the study results                                                                                                                                                                                                                                                                                                                                         | 8-13  |
| <b>Other information</b> |     |                                                                                                                                                                                                                                                                                                                                                                                                               |       |
| Funding                  | 22  | Give the source of funding and the role of the funders for the present study and, if applicable, for the original study on which the present article is based                                                                                                                                                                                                                                                 | 13-14 |

\*Give information separately for cases and controls in case-control studies and, if applicable, for exposed and unexposed groups in cohort and cross-sectional studies.

**Note:** An Explanation and Elaboration article discusses each checklist item and gives methodological background and published examples of transparent reporting. The STROBE checklist is best used in conjunction with this article (freely available on the Web sites of PLoS Medicine at <http://www.plosmedicine.org/>, Annals of Internal Medicine at <http://www.annals.org/>, and Epidemiology at <http://www.epidem.com/>). Information on the STROBE Initiative is available at [www.strobe-statement.org](http://www.strobe-statement.org).
